# Supplementary material for: Analgesic effects of intravenous ketamine after spinal anaesthesia for non-elective caesarean delivery: a randomised controlled trial
Source: PubMed Central journal article supplement — BMJ Open. 2021 Jun 30;11(6):e044168. doi: 10.1136/bmjopen-2020-044168 (PMC8246353; doi:10.1136/bmjopen-2020-044168), 2021-06-30
Supplement: bmjopen-2020-044168.draft_revisions.pdf [file bmjopen-2020-044168.draft_revisions.pdf]

# BMJ Open

BMJ Open is committed to open peer review. As part of this commitment we make the peer review history of every article we publish publicly available.

When an article is published we post the peer reviewers' comments and the authors' responses online. We also post the versions of the paper that were used during peer review. These are the versions that the peer review comments apply to.

The versions of the paper that follow are the versions that were submitted during the peer review process. They are not the versions of record or the final published versions. They should not be cited or distributed as the published version of this manuscript.

BMJ Open is an open access journal and the full, final, typeset and author-corrected version of record of the manuscript is available on our site with no access controls, subscription charges or pay-per-view fees (<http://bmjopen.bmj.com>).

If you have any questions on BMJ Open's open peer review process please email [info.bmjopen@bmj.com](mailto:info.bmjopen@bmj.com)

# BMJ Open

## Effects of Intravenous Ketamine after Spinal Anaesthesia for Non-Elective Caesarean Delivery: A Randomised Controlled Trial

|                               |                                                                                                                                                                                                                                                                                                  |
|-------------------------------|--------------------------------------------------------------------------------------------------------------------------------------------------------------------------------------------------------------------------------------------------------------------------------------------------|
| Journal:                      | <i>BMJ Open</i>                                                                                                                                                                                                                                                                                  |
| Manuscript ID                 | bmjopen-2020-044168                                                                                                                                                                                                                                                                              |
| Article Type:                 | Original research                                                                                                                                                                                                                                                                                |
| Date Submitted by the Author: | 25-Aug-2020                                                                                                                                                                                                                                                                                      |
| Complete List of Authors:     | Adhikari, Prahlad; Narayani Sub-regional Hospital Subedi, Asish; BP Koirala Institute of Health Sciences, Anesthesiology & Critical Care<br>Sah, Birendra; BP Koirala Institute of Health Sciences, Anesthesiology & Critical Care<br>Pokharel, Krishna; BP Koirala Institute of Health Sciences |
| Keywords:                     | PAIN MANAGEMENT, Anaesthesia in obstetrics < ANAESTHETICS, Pain management < ANAESTHETICS                                                                                                                                                                                                        |
|                               |                                                                                                                                                                                                                                                                                                  |

SCHOLARONE™  
Manuscripts

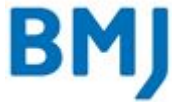

I, the Submitting Author has the right to grant and does grant on behalf of all authors of the Work (as defined in the below author licence), an exclusive licence and/or a non-exclusive licence for contributions from authors who are: i) UK Crown employees; ii) where BMJ has agreed a CC-BY licence shall apply, and/or iii) in accordance with the terms applicable for US Federal Government officers or employees acting as part of their official duties; on a worldwide, perpetual, irrevocable, royalty-free basis to BMJ Publishing Group Ltd ("BMJ") its licensees and where the relevant Journal is co-owned by BMJ to the co-owners of the Journal, to publish the Work in this journal and any other BMJ products and to exploit all rights, as set out in our [licence](#).

The Submitting Author accepts and understands that any supply made under these terms is made by BMJ to the Submitting Author unless you are acting as an employee on behalf of your employer or a postgraduate student of an affiliated institution which is paying any applicable article publishing charge ("APC") for Open Access articles. Where the Submitting Author wishes to make the Work available on an Open Access basis (and intends to pay the relevant APC), the terms of reuse of such Open Access shall be governed by a Creative Commons licence – details of these licences and which [Creative Commons](#) licence will apply to this Work are set out in our licence referred to above.

Other than as permitted in any relevant BMJ Author's Self Archiving Policies, I confirm this Work has not been accepted for publication elsewhere, is not being considered for publication elsewhere and does not duplicate material already published. I confirm all authors consent to publication of this Work and authorise the granting of this licence.

## Title page

### **Analgesic Effects of Intravenous Ketamine after Spinal Anaesthesia for Non-Elective Caesarean Delivery: A Randomised Controlled Trial**

#### **Authors**

Prahlad Adhikari<sup>1</sup>, Asish Subedi<sup>2</sup>, Birendra Prasad Sah<sup>2</sup>, Krishna Pokharel<sup>2</sup>

<sup>1</sup>Narayani Sub-regional Hospital, Birgunj, Parsa, Nepal

<sup>2</sup> Department of Anesthesiology and Critical Care, BP Koirala Institute of Health Sciences, Dharan, Nepal

#### **Corresponding Author:**

Asish Subedi, MD

Department of Anesthesiology & Critical Care

BP Koirala Institute of Health Sciences, Dharan, Nepal

E-mail address: asish\_subedi@alumni.harvard.edu, ashish.subedi@bpkihs.edu

Telephone number: Mobile- 977-9842040604

**Word count**, excluding title page, abstract, references, figures and tables: 2701

**Keywords:** Caesarean Delivery; Ketamine; Opioid; Postoperative pain.

## Abstract

**Objectives:** This study aimed to determine if low dose intravenous ketamine is effective in reducing opioid use and pain after non-elective caesarean delivery.

**Design:** Prospective, randomised, double-blind.

**Setting:** Tertiary hospital, BPKIHS, Dharan, Nepal

**Participants:** 80 patients undergoing non-elective caesarean section with spinal anaesthesia.

**Interventions:** Patients were allocated in 1:1 ratio to receive either intravenous ketamine 0.25 mg/kg or normal saline before the skin incision.

**Primary and secondary outcome measures:** The primary outcome was the total amount of morphine equivalents needed up to postoperative 24 hours. Postoperative pain scores and the time to the first perception of pain were observed. Maternal adverse effects (nausea, vomiting, hypotension, ketamine related) and neonatal outcome (Apgar score at 1 and 5 min, respiratory depression, NICU referral) were also noted.

**Results:** The median (range) cumulative morphine consumption during the first 24 hours of surgery was 0 (0-4.67) mg in ketamine group and 1 (0-6) mg in saline group ( $p=0.003$ ). The median (range) time to first perception of pain was 6 (1-12) hours and 2 (0.5-6) hours in ketamine and saline group respectively ( $p<0.001$ ). Postoperatively, the numeric rating scale scores for pain was significantly higher in the saline group compared to ketamine group only at 2 hours in the post anesthesia care unit and 6 hours in the ward ( $p<0.05$ ). Maternal adverse effects and neonatal outcomes were comparable between the two groups.

**Conclusions:** Pre-incisional intravenous low dose ketamine was associated with the lower opioids requirement after non-elective caesarean delivery. Significant decrease in pain scores

1  
2  
3  
4 was observed only in the early hours after surgery in parturients receiving ketamine than those  
5  
6 receiving normal saline.  
7

8 **Trial registration:** clinicaltrial.gov- No. NCT03450499  
9

10  
11 **Strengths and limitations of this study:**  
12

- 13  
14 • In this randomised, double-blind study, analgesic effect of pre-incisional ketamine in  
15 non-elective caesarean delivery was explored.  
16  
17  
18 • 80 patients received either IV ketamine 0.25 mg/kg or normal saline before surgical  
19 incision.  
20  
21  
22  
23 • Ketamine reduced total opioid requirement up to 24 hours after surgery compared to  
24 placebo group.  
25  
26  
27  
28 • Administration of low-dose ketamine has opioid-sparing effect.  
29  
30 • One limitation is that the end point of the study was limited to postoperative 24 hours  
31 only.  
32  
33  
34  
35  
36  
37

38 **A funding statement:** This research received no specific grant from any funding agency in the  
39 public, commercial or not-for-profit sectors  
40  
41

42 **A competing interests statement:** None  
43  
44  
45  
46  
47  
48  
49  
50  
51  
52  
53  
54  
55  
56  
57  
58  
59  
60

## Introduction

Effective analgesia following caesarean delivery (CD) is important as it enhances maternal recovery, reduces the risk of deep vein thrombosis, and facilitates the mother's ability to care for her baby.<sup>1</sup> In recent years, both pharmacological and non-pharmacological modalities for post-caesarean analgesia have been extensively studied; yet, none of them are able to provide optimum post-operative analgesia.<sup>2</sup> Importantly, multimodal analgesia provides superior analgesia with fewer adverse effects related to opioids, and therefore, use of non-opioid analgesic in alleviating postoperative pain is generally preferred.<sup>2</sup> In this regard, opioid-sparing drugs, such as ketamine may be valuable in providing better analgesia without major adverse effects.<sup>3</sup>

Both central and peripheral mechanisms have been postulated for ketamine, as it not only abolishes peripheral afferent noxious stimuli but also prevents central sensitization.<sup>4, 5</sup> A recent meta-analysis demonstrated that perioperative administration of non-competitive N-methyl-D-aspartate (NMDA) receptor antagonist ketamine reduces postoperative pain intensity and analgesic consumption.<sup>6</sup>

Non-opioid analgesia plays a vital role in providing good quality analgesia during CD. The effect of ketamine on postoperative pain following spinal anaesthesia in an elective CD has been investigated.<sup>7, 8</sup> However, its analgesic role in a non-elective CD has not been explored to date. In this study, we examined the effect of low-dose intravenous (IV) ketamine on opioid requirement as morphine equivalent and pain intensity (as measured by numeric rating scale scores) following spinal anaesthesia for non-elective CD.

## Methods

This prospective, randomised, placebo-controlled, double-blind study was conducted at B.P. Koirala Institute of Health Sciences (BPKIHS), Dharan, Nepal, between April 2, 2018, and March 7, 2019. This study was approved by the BPKIHS Institutional Review Committee (IRC #1089/017) and written informed consent was obtained from all subjects participating in the trial. The trial was registered prior to patient enrollment at [clinicaltrials.gov](https://clinicaltrials.gov) (NCT03450499, Principal investigator: Prahlad Adhikari, Date of registration: March 1, 2018). The study was conducted according to the ethical principles reported in the Declaration of Helsinki and adheres to the CONSORT (Consolidated Standards of Reporting Trials) statement.

Parturients at term undergoing non-elective, category 2 and 3 (according to NICE guideline classification of urgency of emergency caesarean),<sup>9</sup> lower segment CD under spinal anaesthesia with American Society of Anesthesiologists physical status (ASA PS) II were eligible for this trial. Women with body mass index  $\geq 40$  kg/m<sup>2</sup>, height <150 cm, current use of pain medication including opioids, history of substance abuse or hallucinations, cardiovascular disease, diabetes, multiple gestations, known fetal abnormality, chronic pain were excluded. Other exclusion criteria were contraindications to the spinal anaesthesia, severely compromised fetus requiring general anaesthesia and those patients who received labour analgesia.

Independent anaesthesia supporting staff randomly assigned the patients in a 1:1 ratio to receive either ketamine or normal saline using a computer-generated simple random sequence. The patient allocation was concealed in sealed opaque envelopes marked with the study identification number. The anaesthesia assistant who was not involved in the study opened the concealed envelope and prepared the study drug in a syringe according to the group allocation and labelled



1  
2  
3  
4 it. The study subject and the investigators assessing the outcome were blinded to the group  
5  
6 assignment. Group KET received IV ketamine (Ketamax<sup>®</sup>, Troikaa Pharmaceuticals Ltd,  
7  
8 Gujarat, India) 0.25 mg/kg and group NS received 0.9 % normal saline.  
9

10  
11 A total of 80 (40 in each group) patients were enrolled. Each eligible patient was informed about  
12  
13 the nature of the study in the labour room or emergency ward once the decision was made  
14  
15 regarding CD. Subsequently, written informed consent was obtained, and pre-anaesthetic  
16  
17 checkup was done. During this visit, patients were also educated on the use of a 10-cm numeric  
18  
19 rating scale (NRS), with 0 representing no pain and 10 representing the worst imaginable pain.  
20  
21 All patients received IV metoclopramide 10 mg and ranitidine 50 mg for aspiration prophylaxis.  
22  
23 Patients were transferred to the operating room and standard monitoring was applied. An  
24  
25 infusion of Lactated Ringer's (RL) solution was initiated at a minimal rate via 18-gauge IV  
26  
27 cannula placed on the forearm.  
28  
29  
30

31  
32  
33 With the patient in an appropriate position, a 25 gauge Quincke needle was inserted at L3-4 or  
34  
35 L4-5 interspace; and intrathecal (IT) 2.2 ml of 0.5% bupivacaine with 10 µg fentanyl was  
36  
37 administered. An anaesthesiologist who was unaware of the study group injected the spinal drug.  
38  
39 RL was administered at a rapid rate beginning at the time of the intrathecal injection. After  
40  
41 noting the time of injection, the patient was placed in a supine position with 15 degrees left tilt.  
42  
43 The study drug, according to the allocated group was injected intravenously just before the  
44  
45 surgical incision. Oxygen was administered via the face mask at the rate of 5 L/min.  
46  
47  
48

49  
50 The onset of a sensory block was assessed using alcohol-soaked cotton swabs. At every minute,  
51  
52 the sensory block level was checked. When the sensory block reached the T6 level, surgery was  
53  
54 started. Intraoperative pain was managed with fentanyl 20 µg titrated to a maximum of 100 µg  
55  
56  
57  
58  
59  
60

1  
2  
3  
4 by the attending anaesthesiologist. Intraoperative fall of systolic arterial pressure >20% of the  
5  
6 baseline or < 100 mmHg and heart rate (HR) < 50 beats/min were considered significant.  
7  
8 Hypotension was managed with increasing fluid administration (RL) rate and IV phenylephrine  
9  
10 50 µg (if HR>50 beats/min) or ephedrine 6 mg (if HR< 50 beats/min). Bradycardia (HR<50  
11  
12 beats/min) was managed with Atropine 0.4 mg IV. Time from the spinal injection to the delivery  
13  
14 was noted. After the delivery of baby, 3 IU of oxytocin was administered IV over  $\geq$  30 sec  
15  
16 followed by an infusion of 10 IU/hr (oxytocin 40 IU in 500 ml of Hartmann's solution).  
17  
18 Newborn Apgar score was noted at 1 and 5 min after birth. Both groups received 1 g IV  
19  
20 paracetamol every 6 hours and 30 mg IV ketorolac every 8 hours starting at the end of surgery.  
21  
22  
23

24  
25 Postoperative pain was evaluated using NRS at rest and on an attempt to move or bend forward  
26  
27 from the bed. During the stay at postanesthesia care unit (PACU; On arrival, 1 and 2 hours  
28  
29 thereafter), if NRS score was >3, the patient received IV fentanyl 15 µg, and it was repeated  
30  
31 every 5 minutes until NRS was  $\leq$  3. In the post-operative ward (6, 12, and 24 hours) IV  
32  
33 morphine 2 mg was administered for NRS score >3, and it was repeated until NRS  $\leq$  3.  
34  
35  
36

37  
38 The primary outcome was the total consumption of opioids as morphine equivalents up to 24  
39  
40 hours after surgery. Secondary outcomes were postoperative pain scores at rest and on  
41  
42 movement; time to the first perception of pain (in hours); maternal adverse effects (incidence of  
43  
44 nausea, vomiting, shivering, diplopia, nystagmus, hallucination); neonatal Apgar scores;  
45  
46 neonates requiring resuscitation and intensive care admission. Maternal adverse effects were  
47  
48 noted intraoperatively and up to 24 hours after surgery. Nausea and vomiting were rated on a  
49  
50 scale of 0 to 3 (0, No nausea, no vomiting, 1 Light nausea, no vomiting episodes, 2 Moderate  
51  
52 nausea, one or two vomiting episodes, 3 severe nausea, three or more vomiting episodes).<sup>10</sup> IV  
53  
54 Ondansetron 4 mg was given when the score was  $\geq$  2. Shivering was graded using a scale  
55  
56  
57  
58  
59  
60

1  
2  
3  
4 described by Tsai and Chu.<sup>11</sup> Pethidine 20 mg was administered IV if shivering involved the  
5  
6 whole body. The equivalent dose of fentanyl consumed (intraoperative and PACU) for pain and  
7  
8 pethidine needed for shivering was converted to morphine from online dose equivalent calculator  
9  
10 ([www.globalrph.com/medcalcs/opioid-pain-management-converter-advanced](http://www.globalrph.com/medcalcs/opioid-pain-management-converter-advanced)).

### 14 **Statistical analysis:**

15  
16  
17 The data collected in the case report form were entered in the Microsoft Excel 2016 software. All  
18  
19 analysis was conducted using STATA software version 15 (Stata Corporation, College Station,  
20  
21 TX, USA). Normality of the data were checked using histogram, Kurtosis Skewness test and  
22  
23 Sapiro Wilk test. Parametric data were presented as mean  $\pm$  standard deviation and non-  
24  
25 parametric data as median (range). For the normally distributed data, Student *t*-test and for the  
26  
27 non-normally distributed data, Mann-Whitney *U* test were applied. Time to the first perception  
28  
29 of pain was analyzed using the Kaplan-Meier curve and compared using the log-rank test. The  
30  
31 categorical data were compared using the chi-square test or Fisher exact test as appropriate. A *p*-  
32  
33 value of less than 0.05 was considered statistically significant.  
34  
35  
36  
37

### 38 **Sample size**

39  
40  
41 The sample size was calculated based on a previous study,<sup>12</sup> which showed a mean  $\pm$  SD  
42  
43 consumption of pethidine in the ketamine group as  $54.17 \pm 12.86$  mg and  $74.44 \pm 33.82$  mg in  
44  
45 the placebo group. To detect this difference, assuming  $\alpha = 0.05$  and  $\beta = 0.1$  (90% power) and  
46  
47 using the 2-tailed Student *t*-test, 34 subjects were required in each group (STATA version 15,  
48  
49 Stata Corporation, College Station, TX, USA). Finally, forty patients were assigned to each  
50  
51 group to allow for possible dropouts.  
52  
53  
54  
55  
56  
57  
58  
59  
60

## Results

Among 92 women eligible for the study, 80 were enrolled, as eight subjects did not meet the inclusion criteria and four refused to give consent. (Fig.1) The demographic and clinical characteristics of both groups are demonstrated in Table 1.

The median (range) 24 hours morphine equivalent required in KET group was 0 (0-4.67) mg compared to 1 (0-6) mg in NS group ( $p=0.003$ ). Mean 24 hours morphine consumption was  $0.53 \pm 1.22$  mg in the KET group and  $1.58 \pm 1.87$  mg in the NS group (mean difference – 1.05 mg,  $p=0.004$ ). In PACU, median (range) dose of fentanyl consumed was 0 (0-0)  $\mu$ g in parturients receiving ketamine versus 0 (0-20)  $\mu$ g in those receiving normal saline ( $p=0.01$ ). In the surgical unit, median morphine consumed was 0 (0-4) mg in the KET group and 0 (0-4) mg in the NS group ( $p=0.02$ ). Significant differences between the two groups in terms of postoperative pain scores at rest were observed only at 2 hours and 6 hours (Table 2). Likewise, the pain scores during movement between the two groups were significant at 2 hours and 6 hours after surgery (Table 2). The pain-free period in 50 percent of subjects in the KET group was 6 hours whereas in the NS group this period was reduced to 2 hours ( $p < 0.001$ , Fig. 2).

There were no significant differences in maternal adverse effects between the two groups (Table 3). The median pethidine required for shivering was 0 (0-20) mg in the KET group and 20 (0-20) mg in the NS group ( $p=0.36$ ). In the KET group, one patient complained of diplopia and one patient manifested nystagmus. There were no cases of hallucination in either group. Neonatal APGAR scores at 1 and 5 min, number of neonates requiring resuscitation or intensive care admission were comparable between the two groups (Table 3). No neonatal deaths were observed.

**Discussion:**

Our study showed that pre-incisional IV low dose ketamine reduced perioperative opioid requirement in patients undergoing non-elective CD under spinal anaesthesia as compared to the placebo. Lower pain scores were observed in the ketamine group as compared to the placebo at 2 and 6 hours postoperatively. In addition, the time to the first perception of pain was earlier in the normal saline group than the ketamine group.

Opioids will continue to play an important role in perioperative pain management during CD; but because of several unwanted effects associated with its use, non-opioid analgesics are generally added.<sup>13,14</sup> Moreover, in resource-limited settings, longer acting neuraxial opioids are less frequently used for post-CS analgesia because of its poor availability and lack of dedicated monitoring postoperatively.<sup>13</sup> In this regard, opioid sparing agents such as ketamine may prove to be beneficial. Though ketamine is widely used as an anesthetic induction agent, in recent times, its role has widened. Among several new indications, perioperative administration of low-dose systemic ketamine has demonstrated analgesic properties.<sup>6</sup>

A sub-group study from a meta-analysis in 2015 that evaluated five trials performed under spinal anesthesia for elective CD found a significant reduction in cumulative morphine consumption with ketamine compared with the placebo group.<sup>15</sup> However, high heterogeneity was observed among the studies, and this was probably due to variation in ketamine regimen. Two studies had used a pre-incisional single dose of 0.15 mg/kg ketamine and the other one had used a fixed dose of 30 mg, while the remaining two studies had continued the infusion of ketamine either until the end of surgery or up to 24 h postoperatively. We administered a single dose of 0.25 mg/kg ketamine immediately after spinal injection because bolus dose up to 1 mg/kg IV is considered a

1  
2  
3  
4 sub-anaesthetic dose.<sup>16</sup> A recent meta-analysis also supported this fact where more than 50% of  
5  
6 the studies included in the analysis had used doses of ketamine boluses  $\leq 1\text{mg/kg}$ .<sup>6</sup>  
7  
8

9 Although we observed a statistically significant difference for the mean cumulative morphine  
10  
11 requirement in the first 24 hours, it may be regarded as clinically insignificant because the mean  
12  
13 difference was 1 mg. One reason for this small difference in overall opioid consumption and no  
14  
15 significant change in pain intensity in late hours is likely due to the use of multimodal analgesia.  
16  
17 In both the groups we used IV paracetamol and ketorolac round the clock while an opioid was  
18  
19 used as rescue analgesia. Unlike other studies where a single bolus dose of pre-incisional  
20  
21 ketamine was administered, analgesics in postoperative period were given only for breakthrough  
22  
23 pain.<sup>8,12</sup> As a result, in those studies a larger difference in total morphine equivalent consumption  
24  
25 was observed that ranged from 2.11 mg to 6.8 mg. In another study, contradict to our findings,  
26  
27 low dose ketamine did not offer any postoperative benefits despite using multimodal analgesia.<sup>7</sup>  
28  
29 In the above study, IT morphine was administered, and therefore, the prolonged analgesic effect  
30  
31 of IT morphine could have overshadowed the analgesic effect of ketamine.  
32  
33  
34  
35  
36

37 Several studies have explored the association between perioperative ketamine administration and  
38  
39 postoperative nausea and vomiting (PONV). In patients with high risk for PONV undergoing  
40  
41 lumbar spine surgery, ketamine increased the incidence of nausea.<sup>17</sup> The emetogenic effect of  
42  
43 ketamine is likely due to its inhibitory action on serotonin uptake at the synaptic terminal;  
44  
45 however, the precise mechanism remains elusive.<sup>18, 19</sup> Although we did not observe a significant  
46  
47 change in the incidence of PONV, the role of ketamine for PONV during CD is still uncertain.  
48  
49 While one study found a reduced incidence of intraoperative nausea and vomiting, another  
50  
51 showed an increased frequency of vomiting.<sup>20, 21</sup> As a result, there are assumptions made for and  
52  
53 against the role of ketamine on PONV: emetogenic versus opioid-sparing effects; whether a  
54  
55  
56  
57  
58  
59  
60

1  
2  
3  
4 reduction in the frequency of hypotension indirectly minimizes the PONV episodes. Because  
5  
6 PONV following spinal anaesthesia is multifactorial, it is difficult to establish a causal  
7  
8 relationship between ketamine and PONV. Nevertheless, large clinical trials are warranted  
9  
10 before any conclusion can be drawn. Prophylactic use of low doses of ketamine is effective in  
11  
12 preventing shivering post-spinal anaesthesia for CD.<sup>22</sup> Although we found fewer parturients from  
13  
14 ketamine group required pethidine for shivering in comparison to normal saline group, the  
15  
16 difference was not significant statistically. The reason for this observation could be because our  
17  
18 study not powered enough to detect this difference.  
19  
20  
21  
22

23 Ketamine crosses the placenta rapidly and has a mean fetal-maternal (F: M) ratio of 1.26  
24  
25 following an intravenous induction dose of anaesthesia.<sup>23</sup> As a result, concern has been  
26  
27 expressed as to whether or not ketamine administered in clinical doses at the time of delivery  
28  
29 produces neurotoxic effects in newborns. Animal studies have shown the dose and exposure  
30  
31 dependent effect of ketamine on developing brain. A 5-h ketamine infusion in pregnant rhesus  
32  
33 female monkey produced neuronal apoptosis in the fetal brain;<sup>24</sup> On the other hand, no serious  
34  
35 complication was observed in lamb fetus after pregnant ewes were anaesthetized with 20 mg/kg  
36  
37 of IV ketamine for caesarean delivery.<sup>25</sup> Based on clinical studies, a meta-analysis on the role of  
38  
39 intravenous ketamine in parturients undergoing CD demonstrated no differences in the Apgar  
40  
41 scores of neonates between ketamine-treated and placebo group.<sup>15</sup> Likewise, ketamine  
42  
43 administered at 1 mg/kg IV in parturient did not worsen the newborn acid-base status in  
44  
45 comparison to either thiopentone anesthesia or placebo group.<sup>26, 27</sup> We too observed no  
46  
47 significant difference in neonatal outcomes between the two groups. As there is a paucity of data  
48  
49 related to the neurodevelopmental effects in neonates after exposure of ketamine during CD, it is  
50  
51 wise not to exceed ketamine doses above 1.5 mg/kg IV, and infusions are probably best avoided.  
52  
53  
54  
55  
56  
57  
58  
59  
60

1  
2  
3  
4 In conclusion, our findings indicate that administration of pre-incisional low dose ketamine  
5  
6 during non-elective caesarean delivery under spinal anaesthesia reduces perioperative overall  
7  
8 opioid requirement and lowers the pain scores in the early hours after surgery.  
9  
10  
11  
12  
13  
14  
15  
16  
17  
18  
19  
20  
21  
22  
23  
24  
25  
26  
27  
28  
29  
30  
31  
32  
33  
34  
35  
36  
37  
38  
39  
40  
41  
42  
43  
44  
45  
46  
47  
48  
49  
50  
51  
52  
53  
54  
55  
56  
57  
58  
59  
60

For peer review only



## References

1. Yost NP, Bloom SL, Sibley MK, Lo JY, McIntire DD, Leveno KJ. A hospital-sponsored quality improvement study of pain management after cesarean delivery. *Am J Obstet Gynecol.* 2004; **190**: 1341–6.
2. Kerai S, Saxena KN, Taneja B. Post-caesarean analgesia: What is new? *Indian J Anaesth.* 2017; **61**: 200–14.
3. Bell RF, Dahl JB, Moore RA, Kalso E. Perioperative ketamine for acute postoperative pain. *Cochrane Database Syst Rev.* 2006; **1**:CD004603.
4. Woolf CJ, Thompson SW. The induction and maintenance of central sensitization is dependent on N-methyl-d-aspartic acid receptor activation; implications for the treatment of post-injury pain hypersensitivity states. *Pain.* 1991; **44**: 293–9.
5. Pockett S. Spinal cord synaptic plasticity and chronic pain. *Anesth Analg.* 1995; **80**: 173–9.
6. Brinck EC, Tiippana E, Heesen M, *et al.* Perioperative intravenous ketamine for acute postoperative pain in adults. *Cochrane Database Syst Rev.* 2018; **12**: CD012033.
7. Bauchat JR, Higgins N, Wojciechowski KG, McCarthy RJ, Toledo P, Wong CA. Low-dose ketamine with multimodal postcesarean delivery analgesia: a randomized controlled trial. *Int J Obstet Anesth.* 2011; **20**: 3–9.
8. Menkiti ID, Desalu I, Kushimo OT. Low-dose intravenous ketamine improves postoperative analgesia after caesarean delivery with spinal bupivacaine in African parturients. *Int J Obstet Anesth.* 2012; **21**: 217-21.

- 1  
2  
3  
4 9. Yentis SM, Richards NA. Classification of urgency of caesarean section. *Obstet*  
5  
6 *Gynaecol Reprod Med.* 2008; 18: 139–40.  
7  
8
- 9  
10 10. Callesen T, Schouenborg L, Nielsen D, Guldager H, Kehlet H. Combined epidural–spinal  
11  
12 opioid-free anaesthesia and analgesia for hysterectomy. *Br J Anaesth.* 1999; **82**: 881–5.  
13
- 14  
15 11. Tsai YC, Chu KS. A comparison of tramadol, amitriptyline, and meperidine for  
16  
17 postepidural anesthetic shivering in parturients. *Anesth Analg.* 2001; **93**: 1288–92.  
18
- 19  
20 12. Behdad S, Hajiesmaeili MR, Abbasi HR, Ayatollahi V, Khadiv Z, Sedaghat A. Analgesic  
21  
22 effects of intravenous ketamine during spinal anesthesia in pregnant women undergone  
23  
24 caesarean section; a randomized clinical trial. *Anesth Pain Med.* 2013; **3**: 230–3.  
25  
26
- 27  
28 13. Bishop DG, Gibbs MW, Dyer RA. Post-caesarean delivery analgesia in resource-limited  
29  
30 settings: a narrative review. *Int J Obstet Anesth.* 2019; **40**:119-27.  
31
- 32  
33 14. Hamburger J, Beilin Y. Systemic adjunct analgesics for cesarean delivery: a narrative  
34  
35 review. *Int J Obstet Anesth.* 2019; **40**:101-118.  
36  
37
- 38  
39 15. Heesen M, Böhmer J, Brinck EC, *et al.* Intravenous ketamine during spinal and general  
40  
41 anaesthesia for caesarean section: systematic review and meta-analysis. *Acta*  
42  
43 *Anaesthesiol Scand.* 2015; **59**: 414-26.  
44
- 45  
46 16. Schmid RL, Sandler AN, Katz J. Use and efficacy of low-dose ketamine in the  
47  
48 management of acute postoperative pain: a review of current techniques and outcomes.  
49  
50 *Pain.* 1999; **82**: 111-25.  
51
- 52  
53 17. Song JW, Shim JK, Song Y, Yang SY, Park SJ, Kwak YL. Effect of ketamine as an  
54  
55 adjunct to intravenous patient-controlled analgesia, in patients at high risk of  
56  
57  
58  
59

- 1  
2  
3  
4 postoperative nausea and vomiting undergoing lumbar spinal surgery. *Br J Anaesth.*  
5  
6 2013; **111**: 630-5.  
7  
8  
9 18. Ghoneim MM, Hinrichs JV, Mewaldt SP, Petersen RC. Ketamine: behavioral effects of  
10  
11 subanesthetic doses. *J Clin Psychopharmacol.* 1985; **5**: 70–7.  
12  
13  
14 19. Martin DC, Watkins CA, Adams RJ, Nason LA. Anesthetic effects on 5-  
15  
16 hydroxytryptamine uptake by rat brain synaptosomes. *Brain Res.* 1988; **455**: 360–5.  
17  
18  
19 20. Suppa E, Valente A, Catarci S, Zanfini BA, Draisci G. A study of low-dose S-ketamine  
20  
21 infusion as "preventive" pain treatment for cesarean section with spinal anesthesia:  
22  
23 benefits and side effects. *Minerva Anesthesiol.* 2012; **78**: 774-81.  
24  
25  
26 21. Shabana AM, Nasr ES, Moawad HE. Effect of ketamine on intraoperative nausea and  
27  
28 vomiting during elective caesarean section under spinal anaesthesia: A placebo-  
29  
30 controlled prospective randomized double blinded study. *Egypt J Anaesth.* 2012; **28**:169–  
31  
32 74.  
33  
34  
35  
36 22. Liu J, Wang Y, Ma W. Shivering prevention and treatment during cesarean delivery  
37  
38 under neuraxial anesthesia: a systematic review. *Minerva Anesthesiol.* 2018; **84**:1393-405.  
39  
40  
41 23. Ellingson A, Haram K, Sagen N, Solheim E. Transplacental passage of ketamine after  
42  
43 intravenous administration. *Acta Anaesthesiol Scand.* 1977; **21**: 41–44.  
44  
45  
46 24. Brambrink AM, Evers AS, Avidan MS, *et al.* Ketamine-induced neuroapoptosis in the  
47  
48 fetal and neonatal rhesus macaque brain. *Anesthesiology.* 2012; **116**: 372-84.  
49  
50  
51 25. Musk GC, Netto JD, Maker GL, Trengove RD. Transplacental transfer of medetomidine  
52  
53 and ketamine in pregnant ewes. *Lab Anim.* 2012; **46**: 46–50.  
54  
55  
56  
57  
58  
59  
60

- 1  
2  
3  
4 26. Nayar R, Sahajanand H. Does anesthetic induction for cesarean section with a  
5 combination of ketamine and thiopentone confer any benefits over thiopentone or  
6 ketamine alone? A prospective randomized study. *Minerva Anesthesiol.* 2009; **75**:185-90.  
7  
8  
9  
10  
11 27. Maduska AL, Hajghassemali M. Arterial blood gases in mothers and infants during  
12 ketamine anesthesia for vaginal delivery. *Anesth Analg.* 1978; **57**: 121-3.  
13  
14  
15  
16  
17  
18  
19  
20  
21  
22  
23  
24  
25  
26  
27  
28  
29  
30  
31  
32  
33  
34  
35  
36  
37  
38  
39  
40  
41  
42  
43  
44  
45  
46  
47  
48  
49  
50  
51  
52  
53  
54  
55  
56  
57  
58  
59  
60

**Table 1. Comparison of patient demographic, block characteristics and surgical profiles.**

| Variables                                      | KET group<br>n=40 | NS group<br>n=40 | p-value |
|------------------------------------------------|-------------------|------------------|---------|
| Age (in years)                                 | 24.90 ± 4.80      | 25.87 ± 5.53     | 0.40    |
| Height (in cm)                                 | 155.45 ± 3.75     | 156.82 ± 4.25    | 0.12    |
| Body mass index (in kg/m <sup>2</sup> )        | 25.47±2.18        | 26.27±3.16       | 0.19    |
| Gestational age (in weeks)                     | 38.77±1.36        | 38.8±1.69        | 0.94    |
| Indication for Cesarean section                |                   |                  | 0.65    |
| Non reassuring non-stress test                 | 11 (28)           | 16 (40)          |         |
| Previous CS presenting in labour               | 8 (20)            | 6 (15)           |         |
| Meconium stained liquor                        | 6 (15)            | 6 (15)           |         |
| Failed induction                               | 6 (15)            | 7 (17)           |         |
| Others (CPD, Malpresentation)                  | 9 (22)            | 5 (13)           |         |
| Onset block to T6 dermatome (in min)           | 2 (1-7)           | 2 (1-5)          | 0.23    |
| Highest sensory block (dermatome)              | T4 (T2-T4)        | T4 (T2-T4)       | 0.74    |
| Spinal injection to delivery interval (in min) | 20 (13-35)        | 19 (14-40)       | 0.65    |
| Intraoperative fentanyl needed (µg)            | 0 (0-0)           | 0 (0-40)         | 0.15    |

Values are expressed as mean ± SD, number (%), or median (range). CPD = Cephalopelvic disproportion

**Table 2. Comparison of pain scores between two groups.**

| Time points             | KET group<br>n=40 | NS group<br>n=40 | p-value |
|-------------------------|-------------------|------------------|---------|
| <i>At Rest</i>          |                   |                  |         |
| On arrival to PACU      | 0 (0-1)           | 0 (0-4)          | 0.15    |
| 1 h                     | 0 (0-2)           | 0 (0-5)          | 0.06    |
| 2 h                     | 0 (0-2)           | 2 (0-5)          | <0.001  |
| <i>In Surgical Unit</i> |                   |                  |         |
| 6 h                     | 2 (1-4)           | 2 (0-5)          | 0.02    |
| 12 h                    | 2 (0-4)           | 2 (0-5)          | 0.07    |
| 24 h                    | 2 (1-4)           | 2 (0-5)          | 0.23    |
| <i>During Movement</i>  |                   |                  |         |
| On arrival to PACU      | 0 (0-2)           | 0 (0-5)          | 0.08    |
| 1 h                     | 0 (0-3)           | 1 (0-6)          | 0.05    |
| 2 h                     | 2 (0-3)           | 2 (0-5)          | < 0.001 |
| <i>In Surgical Unit</i> |                   |                  |         |
| 6 h                     | 2 (0-4)           | 3 (2-6)          | 0.001   |
| 12 h                    | 3 (2-4)           | 3 (2-6)          | 0.22    |
| 24 h                    | 3 (2-6)           | 3 (2-6)          | 0.81    |

Values are expressed in median (range)

**Table 3. Maternal adverse effects and neonatal outcomes**

|                                            | <b>KET group</b> | <b>NS group</b> | <b><i>p</i>-value</b> |
|--------------------------------------------|------------------|-----------------|-----------------------|
|                                            | <b>n=40</b>      | <b>n=40</b>     |                       |
| Hypotension                                | 13 (32)          | 16 (40)         | 0.48                  |
| Nausea or vomiting                         | 4 (10)           | 5 (12)          | 0.72                  |
| Shivering requiring pethidine              | 5 (12)           | 8 (20)          | 0.36                  |
| APGAR score 1 min                          | 8 (6-8)          | 8 (6-8)         | 0.54                  |
| APGAR score 5 min                          | 9 (7-9)          | 9 (8-9)         | 0.67                  |
| Resuscitation needed in neonate (n)        | 1 (2%)           | 1 (2%)          | 1.0                   |
| Neonatal intensive care unit admission (n) | 1 (2%)           | 2 (5%)          | 1.0                   |

Values are in median (range) and number (percentage)

### Figure legends

Fig. 1 Consort flow diagram of the study.

Fig. 2 Kaplan meier graph showing time to first perception of pain between two groups.

### Authors' Contributions

Prahlad Adhikari: This author helped in study design, patient recruitment, data collection and writing up of the first draft of the paper

Asish Subedi: This author helped in study design, patient recruitment, analysis and interpretation of data, manuscript revision and final draft

Birendra Prasad Sah: This author helped in study design, data collection and manuscript revision.

Krishna Pokharel: This author helped in study design, patient recruitment and final draft



1  
2  
3  
4  
5  
6  
7  
8  
9  
10  
11  
12  
13  
14  
15  
16  
17  
18  
19  
20  
21  
22  
23  
24  
25  
26  
27  
28  
29  
30  
31  
32  
33  
34  
35  
36  
37  
38  
39  
40  
41  
42  
43  
44  
45  
46  
47  
48  
49  
50  
51  
52  
53  
54  
55  
56  
57  
58  
59  
60

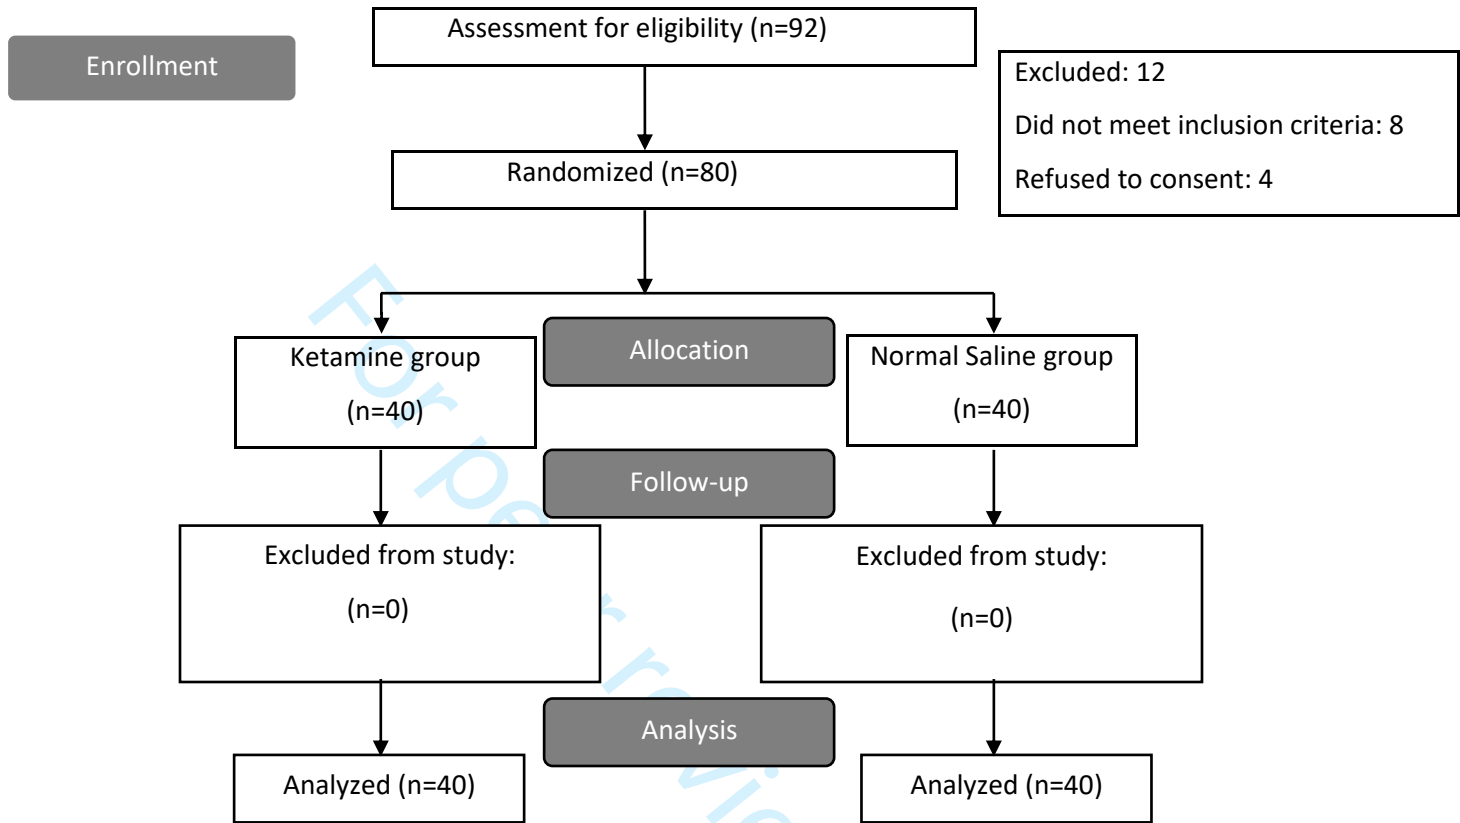

1  
2  
3  
4  
5  
6  
7  
8  
9  
10  
11  
12  
13  
14  
15  
16  
17  
18  
19  
20

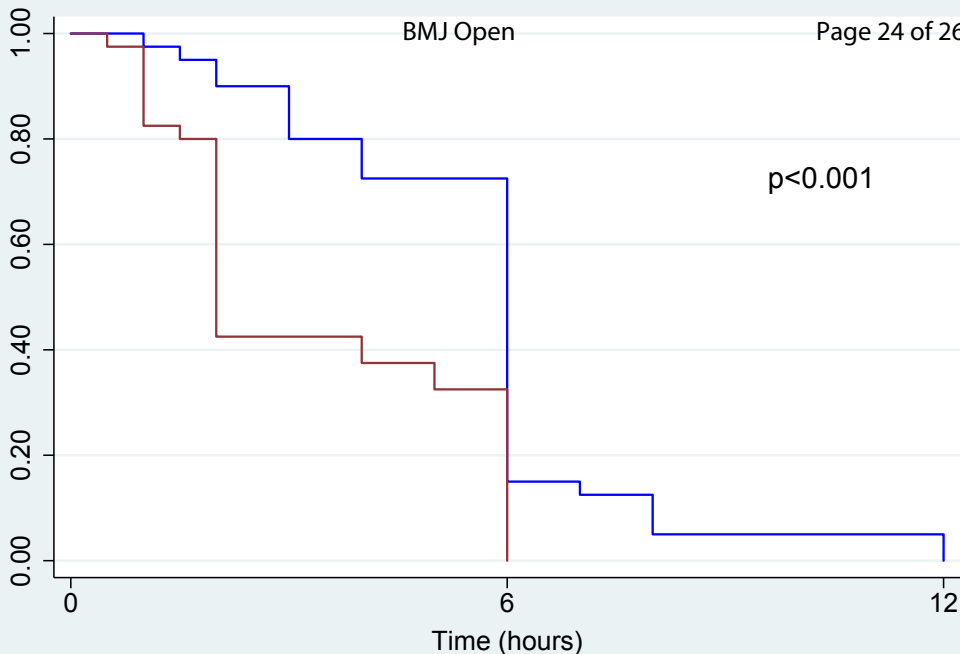

$p < 0.001$

Time (hours)  
For peer review only - <http://bmjopen.bmj.com/site/about/guidelines.xhtml>

— ketamine group — Normal saline group

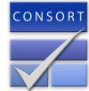

## CONSORT 2010 checklist of information to include when reporting a randomised trial\*

| Section/Topic                    | Item No | Checklist item                                                                                                                                                                              | Reported on page No |
|----------------------------------|---------|---------------------------------------------------------------------------------------------------------------------------------------------------------------------------------------------|---------------------|
| <b>Title and abstract</b>        |         |                                                                                                                                                                                             |                     |
|                                  | 1a      | Identification as a randomised trial in the title                                                                                                                                           | 1                   |
|                                  | 1b      | Structured summary of trial design, methods, results, and conclusions (for specific guidance see CONSORT for abstracts)                                                                     | 2,3                 |
| <b>Introduction</b>              |         |                                                                                                                                                                                             |                     |
| Background and objectives        | 2a      | Scientific background and explanation of rationale                                                                                                                                          | 4                   |
|                                  | 2b      | Specific objectives or hypotheses                                                                                                                                                           | 4                   |
| <b>Methods</b>                   |         |                                                                                                                                                                                             |                     |
| Trial design                     | 3a      | Description of trial design (such as parallel, factorial) including allocation ratio                                                                                                        | 5                   |
|                                  | 3b      | Important changes to methods after trial commencement (such as eligibility criteria), with reasons                                                                                          | N/A                 |
| Participants                     | 4a      | Eligibility criteria for participants                                                                                                                                                       | 5                   |
|                                  | 4b      | Settings and locations where the data were collected                                                                                                                                        | 5                   |
| Interventions                    | 5       | The interventions for each group with sufficient details to allow replication, including how and when they were actually administered                                                       | 6                   |
| Outcomes                         | 6a      | Completely defined pre-specified primary and secondary outcome measures, including how and when they were assessed                                                                          | 7,8                 |
|                                  | 6b      | Any changes to trial outcomes after the trial commenced, with reasons                                                                                                                       | N/A                 |
| Sample size                      | 7a      | How sample size was determined                                                                                                                                                              | 8                   |
|                                  | 7b      | When applicable, explanation of any interim analyses and stopping guidelines                                                                                                                | N/A                 |
| <b>Randomisation:</b>            |         |                                                                                                                                                                                             |                     |
| Sequence generation              | 8a      | Method used to generate the random allocation sequence                                                                                                                                      | 5                   |
|                                  | 8b      | Type of randomisation; details of any restriction (such as blocking and block size)                                                                                                         | 5                   |
| Allocation concealment mechanism | 9       | Mechanism used to implement the random allocation sequence (such as sequentially numbered containers), describing any steps taken to conceal the sequence until interventions were assigned | 5                   |
| Implementation                   | 10      | Who generated the random allocation sequence, who enrolled participants, and who assigned participants to interventions                                                                     | 5                   |
| Blinding                         | 11a     | If done, who was blinded after assignment to interventions (for example, participants, care providers, those                                                                                | 6                   |

|                                                      |     |                                                                                                                                                   |                                               |
|------------------------------------------------------|-----|---------------------------------------------------------------------------------------------------------------------------------------------------|-----------------------------------------------|
|                                                      |     | assessing outcomes) and how                                                                                                                       |                                               |
|                                                      | 11b | If relevant, description of the similarity of interventions                                                                                       | 6                                             |
| Statistical methods                                  | 12a | Statistical methods used to compare groups for primary and secondary outcomes                                                                     | 8                                             |
|                                                      | 12b | Methods for additional analyses, such as subgroup analyses and adjusted analyses                                                                  | N/A                                           |
| <b>Results</b>                                       |     |                                                                                                                                                   |                                               |
| Participant flow (a diagram is strongly recommended) | 13a | For each group, the numbers of participants who were randomly assigned, received intended treatment, and were analysed for the primary outcome    | Figure 1                                      |
|                                                      | 13b | For each group, losses and exclusions after randomisation, together with reasons                                                                  | Figure 1                                      |
| Recruitment                                          | 14a | Dates defining the periods of recruitment and follow-up                                                                                           | 5,7                                           |
|                                                      | 14b | Why the trial ended or was stopped                                                                                                                | N/A                                           |
| Baseline data                                        | 15  | A table showing baseline demographic and clinical characteristics for each group                                                                  | Table 1                                       |
| Numbers analysed                                     | 16  | For each group, number of participants (denominator) included in each analysis and whether the analysis was by original assigned groups           | Figure 1                                      |
| Outcomes and estimation                              | 17a | For each primary and secondary outcome, results for each group, and the estimated effect size and its precision (such as 95% confidence interval) | Page 9.<br>Figure 2                           |
|                                                      | 17b | For binary outcomes, presentation of both absolute and relative effect sizes is recommended                                                       | Table 3                                       |
| Ancillary analyses                                   | 18  | Results of any other analyses performed, including subgroup analyses and adjusted analyses, distinguishing pre-specified from exploratory         | N/A                                           |
| Harms                                                | 19  | All important harms or unintended effects in each group (for specific guidance see CONSORT for harms)                                             | Table 3                                       |
| <b>Discussion</b>                                    |     |                                                                                                                                                   |                                               |
| Limitations                                          | 20  | Trial limitations, addressing sources of potential bias, imprecision, and, if relevant, multiplicity of analyses                                  | 11,12                                         |
| Generalisability                                     | 21  | Generalisability (external validity, applicability) of the trial findings                                                                         | 10-12                                         |
| Interpretation                                       | 22  | Interpretation consistent with results, balancing benefits and harms, and considering other relevant evidence                                     | 10-13                                         |
| <b>Other information</b>                             |     |                                                                                                                                                   |                                               |
| Registration                                         | 23  | Registration number and name of trial registry                                                                                                    | No.<br>NCT0345049<br>9.<br>clinicaltrials.gov |
| Protocol                                             | 24  | Where the full trial protocol can be accessed, if available                                                                                       | Enclosed as supplementary file                |

Funding 25 Sources of funding and other support (such as supply of drugs), role of funders

\*We strongly recommend reading this statement in conjunction with the CONSORT 2010 Explanation and Elaboration for important clarifications on all the items. If relevant, we also recommend reading CONSORT extensions for cluster randomised trials, non-inferiority and equivalence trials, non-pharmacological treatments, herbal interventions, and pragmatic trials. Additional extensions are forthcoming: for those and for up to date references relevant to this checklist, see [www.consort-statement.org](http://www.consort-statement.org).

For peer review only

# BMJ Open

## Effects of Intravenous Ketamine after Spinal Anaesthesia for Non-Elective Caesarean Delivery: A Randomised Controlled Trial

|                                 |                                                                                                                                                                                                                                                                                                    |
|---------------------------------|----------------------------------------------------------------------------------------------------------------------------------------------------------------------------------------------------------------------------------------------------------------------------------------------------|
| Journal:                        | <i>BMJ Open</i>                                                                                                                                                                                                                                                                                    |
| Manuscript ID                   | bmjopen-2020-044168.R1                                                                                                                                                                                                                                                                             |
| Article Type:                   | Original research                                                                                                                                                                                                                                                                                  |
| Date Submitted by the Author:   | 04-Apr-2021                                                                                                                                                                                                                                                                                        |
| Complete List of Authors:       | Adhikari, Prahlad; Narayani Sub-regional Hospital Subedi, Asish; BP Koirala Institute of Health Sciences, Anaesthesiology & Critical Care<br>Sah, Birendra; BP Koirala Institute of Health Sciences, Anaesthesiology & Critical Care<br>Pokharel, Krishna; BP Koirala Institute of Health Sciences |
| <b>Primary Subject Heading</b>: | Anaesthesia                                                                                                                                                                                                                                                                                        |
| Secondary Subject Heading:      | Anaesthesia, Obstetrics and gynaecology                                                                                                                                                                                                                                                            |
| Keywords:                       | PAIN MANAGEMENT, Anaesthesia in obstetrics < ANAESTHETICS, Pain management < ANAESTHETICS                                                                                                                                                                                                          |
|                                 |                                                                                                                                                                                                                                                                                                    |

SCHOLARONE™  
Manuscripts



I, the Submitting Author has the right to grant and does grant on behalf of all authors of the Work (as defined in the below author licence), an exclusive licence and/or a non-exclusive licence for contributions from authors who are: i) UK Crown employees; ii) where BMJ has agreed a CC-BY licence shall apply, and/or iii) in accordance with the terms applicable for US Federal Government officers or employees acting as part of their official duties; on a worldwide, perpetual, irrevocable, royalty-free basis to BMJ Publishing Group Ltd ("BMJ") its licensees and where the relevant Journal is co-owned by BMJ to the co-owners of the Journal, to publish the Work in this journal and any other BMJ products and to exploit all rights, as set out in our [licence](#).

The Submitting Author accepts and understands that any supply made under these terms is made by BMJ to the Submitting Author unless you are acting as an employee on behalf of your employer or a postgraduate student of an affiliated institution which is paying any applicable article publishing charge ("APC") for Open Access articles. Where the Submitting Author wishes to make the Work available on an Open Access basis (and intends to pay the relevant APC), the terms of reuse of such Open Access shall be governed by a Creative Commons licence – details of these licences and which [Creative Commons](#) licence will apply to this Work are set out in our licence referred to above.

Other than as permitted in any relevant BMJ Author's Self Archiving Policies, I confirm this Work has not been accepted for publication elsewhere, is not being considered for publication elsewhere and does not duplicate material already published. I confirm all authors consent to publication of this Work and authorise the granting of this licence.

## Title page

### **Analgesic Effects of Intravenous Ketamine after Spinal Anaesthesia for Non-Elective Caesarean Delivery: A Randomised Controlled Trial**

#### **Authors**

Prahlad Adhikari<sup>1</sup>, Asish Subedi<sup>2</sup>, Birendra Prasad Sah<sup>2</sup>, Krishna Pokharel<sup>2</sup>

<sup>1</sup>Narayani Sub-regional Hospital, Birgunj, Parsa, Nepal

<sup>2</sup> Department of Anaesthesiology and Critical Care, Bisheshwar Prasad Koirala Institute of Health Sciences (BPKIHS), Dharan, Nepal

#### **Corresponding Author:**

Asish Subedi, MD

Department of Anaesthesiology & Critical Care

Bisheshwar Prasad Koirala Institute of Health Sciences (BPKIHS), Dharan, Nepal

E-mail address: asish\_subedi@alumni.harvard.edu, ashish.subedi@bpkihs.edu

Telephone number: Mobile- 977-9842040604

**Word count**, excluding title page, abstract, references, figures and tables: 3011

**Keywords:** Caesarean Delivery; Ketamine; Opioid; Postoperative pain.



## Abstract

**Objectives:** This study aimed to determine if low dose intravenous ketamine is effective in reducing opioid use and pain after non-elective caesarean delivery.

**Design:** Prospective, randomised, double-blind.

**Setting:** Tertiary hospital, BPKIHS, Dharan, Nepal

**Participants:** 80 patients undergoing non-elective caesarean section with spinal anaesthesia.

**Interventions:** Patients were allocated in 1:1 ratio to receive either intravenous ketamine 0.25 mg/kg or normal saline before the skin incision.

**Primary and secondary outcome measures:** The primary outcome was the total amount of morphine equivalents needed up to postoperative 24 hours. Secondary outcome measures were postoperative pain scores, time to the first perception of pain, maternal adverse effects (nausea, vomiting, hypotension, shivering, diplopia, nystagmus, hallucination) and neonatal Apgar score at 1 and 5 min, neonatal respiratory depression and neonatal intensive-care referral.

**Results:** The median (range) cumulative morphine consumption during the first 24 hours of surgery was 0 (0-4.67) mg in ketamine group and 1 (0-6) mg in saline group ( $p=0.003$ ). The median (range) time to the first perception of pain was 6 (1-12) hours and 2 (0.5-6) hours in ketamine and saline group respectively ( $p<0.001$ ). Postoperatively, the numeric rating scale scores for pain was significantly higher in the saline group compared to ketamine group only at 2 hours in the post anaesthesia care unit and 6 hours in the ward ( $p<0.05$ ). Maternal adverse effects and neonatal outcomes were comparable between the two groups.

**Conclusions:** Pre-incisional intravenous low dose ketamine was associated with the lower opioids requirement after non-elective caesarean delivery. A significant decrease in pain scores

1  
2  
3  
4 was observed only in the early hours after surgery in parturients receiving ketamine than those  
5  
6 receiving normal saline.  
7

8 **Trial registration:** clinicaltrial.gov- No. NCT03450499  
9

10  
11 **Strengths and limitations of this study:**  
12

- 13  
14 • In this randomised, double-blind study, analgesic effect of pre-incisional ketamine in  
15 non-elective caesarean delivery was explored.  
16  
17  
18 • 80 patients received either IV ketamine 0.25 mg/kg or normal saline before surgical  
19 incision.  
20  
21  
22  
23 • Ketamine reduced total opioid requirement up to 24 hours after surgery compared to  
24 placebo group.  
25  
26  
27  
28 • Administration of low-dose ketamine has opioid-sparing effect.  
29  
30 • One limitation is that the end point of the study was limited to postoperative 24 hours  
31 only.  
32  
33  
34

35 **A funding statement:** This research received no specific grant from any funding agency in the  
36 public, commercial or not-for-profit sectors  
37  
38

39 **A competing interests statement:** None  
40

41 **Patient consent for publication:** Not required.  
42  
43

44 **Ethics approval:** The study was approved by the Institutional Review Committee of BPKIHS  
45 (IRC #1089/017). All participants gave informed consent before taking part in the study.  
46  
47  
48

49 **Data availability statement:** Data are available upon request from the first author:  
50

51 asish\_subedi@alumni.harvard.edu  
52  
53  
54  
55  
56  
57  
58  
59  
60

## Introduction

Effective analgesia following caesarean delivery (CD) is important as it enhances maternal recovery, reduces the risk of deep vein thrombosis, and facilitates the mother's ability to care for her baby.<sup>1</sup> In recent years, both pharmacological and non-pharmacological modalities for post-caesarean analgesia have been extensively studied; yet, none of them are able to provide optimum post-operative analgesia.<sup>2</sup> Importantly, multimodal analgesia provides superior analgesia with fewer adverse effects related to opioids, and therefore, use of non-opioid analgesic in alleviating postoperative pain is generally preferred.<sup>2</sup> In this regard, opioid-sparing drugs, such as ketamine may be valuable in providing better analgesia without major adverse effects.<sup>3</sup>

Both central and peripheral mechanisms have been postulated for ketamine, as it not only abolishes peripheral afferent noxious stimuli but also prevents central sensitization.<sup>4, 5</sup> A recent meta-analysis demonstrated that perioperative administration of non-competitive N-methyl-D-aspartate (NMDA) receptor antagonist ketamine reduces postoperative pain intensity and analgesic consumption.<sup>6</sup>

Non-opioid analgesia plays a vital role in providing good quality analgesia during CD. The effect of ketamine on postoperative pain following spinal anaesthesia in an elective CD has been investigated.<sup>7, 8</sup> However, its analgesic role in a non-elective CD have not been explored to date. In this study, we examined the effect of low-dose intravenous (IV) ketamine on opioid requirement as morphine equivalent and pain intensity (as measured by numeric rating scale scores) following spinal anaesthesia for non-elective CD.

## Methods

This prospective, randomised, placebo-controlled, double-blind study was conducted at Bisheshwar Prasad Koirala Institute of Health Sciences (BPKIHS), Dharan, Nepal, between April 2, 2018, and March 7, 2019. This study was approved by the BPKIHS Institutional Review Committee (IRC #1089/017) and written informed consent was obtained from all subjects participating in the trial. The trial was registered prior to patient enrollment at [clinicaltrials.gov](http://clinicaltrials.gov) (NCT03450499, Principal investigator: Prahlad Adhikari, Date of registration: March 1, 2018). The study was conducted according to the ethical principles reported in the Declaration of Helsinki and adheres to the CONSORT (Consolidated Standards of Reporting Trials) statement.

Parturients at term undergoing non-elective, category 2 and 3 (according to NICE guideline classification of urgency of emergency caesarean),<sup>9</sup> lower segment CD under spinal anaesthesia with American Society of Anaesthesiologists physical status (ASA PS) II were eligible for this trial. Women with body mass index  $\geq 40$  kg/m<sup>2</sup>, height <150 cm, current use of pain medication including opioids, history of substance abuse or hallucinations, cardiovascular disease, diabetes, multiple gestations, known fetal abnormality, chronic pain were excluded. Other exclusion criteria were contraindications to the spinal anaesthesia, severely compromised fetus requiring general anaesthesia and those patients who received labour analgesia.

Independent anaesthesia supporting staff randomly assigned the patients in a 1:1 ratio to receive either ketamine or normal saline using a computer-generated simple random sequence. The patient allocation was concealed in sealed opaque envelopes marked with the study identification number. The anaesthesia assistant who was not involved in the study opened the concealed envelope and prepared the study drug in a syringe according to the group allocation and labelled

1  
2  
3  
4 it. The study subject and the investigators assessing the outcome were blinded to the group  
5  
6 assignment. Group KET received IV ketamine (Ketamax<sup>®</sup>, Troikaa Pharmaceuticals Ltd,  
7  
8 Gujarat, India) 0.25 mg/kg and group NS received 0.9 % normal saline.  
9

10  
11 A total of 80 (40 in each group) patients was enrolled. Each eligible patient was informed about  
12  
13 the nature of the study in the labour room or emergency ward once the decision was made  
14  
15 regarding CD. Subsequently, written informed consent was obtained, and a pre-anaesthetic  
16  
17 checkup was done. During this visit, patients were also educated on the use of a 10-cm numeric  
18  
19 rating scale (NRS), with 0 representing no pain and 10 representing the worst imaginable pain.  
20  
21 All patients received IV metoclopramide 10 mg and ranitidine 50 mg for aspiration prophylaxis.  
22  
23 Patients were transferred to the operating room and standard monitoring was applied. An  
24  
25 infusion of Lactated Ringer's (RL) solution was initiated at a minimal rate via 18-gauge IV  
26  
27 cannula placed on the forearm.  
28  
29  
30  
31

32  
33 With the patient in an appropriate position, a 25 gauge Quincke needle was inserted at L3-4 or  
34  
35 L4-5 interspace; and intrathecal (IT) 2.2 ml of 0.5% heavy bupivacaine with 10 µg fentanyl was  
36  
37 administered. An anaesthesiologist who was unaware of the study group injected the spinal drug.  
38  
39 RL was administered at a rapid rate beginning at the time of the intrathecal injection. After  
40  
41 noting the time of injection, the patient was placed in a supine position with 15 degrees left tilt.  
42  
43 The study drug, according to the allocated group was injected intravenously just before the  
44  
45 surgical incision. Oxygen was administered via the face mask at the rate of 5 L/min.  
46  
47  
48

49  
50 The onset of a sensory block was assessed using alcohol-soaked cotton swabs. Initially, every  
51  
52 minute, the sensory block level was checked. When the sensory block reached the T6 level,  
53  
54 surgery was started. Intraoperative pain was managed with fentanyl 20 µg titrated to a maximum  
55  
56  
57  
58  
59  
60

1  
2  
3  
4 of 100 µg by the attending anaesthesiologist. Intraoperative fall of systolic arterial pressure  
5  
6 >20% of the baseline or < 100 mmHg and heart rate (HR) < 50 beats/min were considered  
7  
8 significant. Hypotension was managed with increasing fluid administration (RL) rate and IV  
9  
10 phenylephrine 50 µg (if HR>50 beats/min) or ephedrine 6 mg (if HR< 50 beats/min).  
11  
12 Bradycardia (HR<50 beats/min) was managed with Atropine 0.4 mg IV. Time from the spinal  
13  
14 injection to the delivery was noted. After the delivery of baby, 3 IU of oxytocin was  
15  
16 administered IV over ≥ 30 secs followed by an infusion of 10 IU/hr (oxytocin 40 IU in 500 ml of  
17  
18 Hartmann's solution). Newborn Apgar score was noted at 1 and 5 min after birth. Both groups  
19  
20 received 1 g IV paracetamol every 6 hours and 30 mg IV ketorolac every 8 hours starting at the  
21  
22 end of surgery.  
23  
24  
25

26  
27 Postoperative pain was evaluated using NRS at rest and on an attempt to move or bend forward  
28  
29 from the bed. During the stay at the postanesthesia care unit (PACU; On arrival, 1 and 2 hours  
30  
31 thereafter), if NRS score was >3, the patient received IV fentanyl 15 µg, and it was repeated  
32  
33 every 5 minutes until NRS was ≤ 3. In the post-operative ward (6, 12, and 24 hours) IV  
34  
35 morphine 2 mg was administered for NRS score >3, and it was repeated until NRS ≤ 3.  
36  
37  
38

39  
40 The primary outcome was the total consumption of opioids as morphine equivalents up to 24  
41  
42 hours after surgery. Secondary outcomes were postoperative pain scores at rest and on  
43  
44 movement; time to the first perception of pain (in hours); maternal adverse effects (incidence of  
45  
46 nausea, vomiting, shivering, diplopia, nystagmus, hallucination); neonatal Apgar scores;  
47  
48 neonates requiring resuscitation and intensive-care admission. Maternal adverse effects were  
49  
50 noted intraoperatively and up to 24 hours after surgery. Presence of hallucination was based on a  
51  
52 criterion of verbally reporting of sensory experiences with or without intuition and not triggered  
53  
54 by a relevant stimulus.<sup>10</sup> Nausea and vomiting were rated on a scale of 0 to 3 (0, No nausea, no  
55  
56  
57  
58  
59  
60

1  
2  
3  
4 vomiting, 1 Light nausea, no vomiting episodes, 2 Moderate nausea, one or two vomiting  
5 episodes, 3 severe nausea, three or more vomiting episodes).<sup>11</sup> IV Ondansetron 4 mg was given  
6 when the score was  $\geq 2$ . Shivering was graded using a scale described by Tsai and Chu.<sup>12</sup>  
7  
8 Pethidine 20 mg was administered IV if shivering involved the whole body. The equivalent dose  
9 of fentanyl consumed (intraoperative and PACU) for pain and pethidine needed for shivering  
10 was converted to morphine from an online dose equivalent calculator  
11 ([www.globalrph.com/medcalcs/opioid-pain-management-converter-advanced](http://www.globalrph.com/medcalcs/opioid-pain-management-converter-advanced)).  
12  
13  
14  
15  
16  
17  
18  
19  
20

### 21 **Statistical analysis:**

22  
23 The data collected in the case report form were entered in the Microsoft Excel 2016 software. All  
24 analysis was conducted using STATA software version 15 (Stata Corporation, College Station,  
25 TX, USA). Normality of the data was checked using histogram, Kurtosis Skewness test and  
26 Sapiro Wilk test. Parametric data were presented as mean  $\pm$  standard deviation and non-  
27 parametric data as median (range). For the normally distributed data, Student *t*-test and for the  
28 non-normally distributed data, Mann-Whitney *U* test were applied. The categorical data were  
29 compared using the chi-square test or Fisher exact test as appropriate. Post-hoc analysis using the  
30 Bonferroni correction was applied for comparisons of postoperative pain scores between the two  
31 groups. For this, an adjustment of the alpha value was made as 0.05 divided by six-time points of  
32 assessment, i.e.  $0.05/6 = 0.008$ .  
33  
34  
35  
36  
37  
38  
39  
40  
41  
42  
43  
44  
45  
46

### 47 **Sample size**

48  
49 The sample size was calculated based on a previous study,<sup>13</sup> which showed a mean  $\pm$  SD  
50 consumption of pethidine in the ketamine group as  $54.17 \pm 12.86$  mg and  $74.44 \pm 33.82$  mg in  
51 the placebo group. To detect this difference, assuming  $\alpha = 0.05$  and  $\beta = 0.1$  (90% power) and  
52  
53  
54  
55  
56  
57  
58  
59  
60

1  
2  
3  
4 using the 2-tailed Student t-test, 34 subjects were required in each group (STATA version 15,  
5  
6 Stata Corporation, College Station, TX, USA). Finally, forty patients were assigned to each  
7  
8 group to allow for possible dropouts.  
9

### 10 11 **Patient and Public Involvement** 12

13  
14 Patients or the public were not involved in the design, or conduct, or reporting, or dissemination  
15  
16 plans of our research.  
17  
18  
19  
20  
21  
22  
23  
24  
25  
26  
27  
28  
29  
30  
31  
32  
33  
34  
35  
36  
37  
38  
39  
40  
41  
42  
43  
44  
45  
46  
47  
48  
49  
50  
51  
52  
53  
54  
55  
56  
57  
58  
59  
60



## Results

Among 92 women eligible for the study, 80 were enrolled, as eight subjects did not meet the inclusion criteria and four refused to give consent. (Fig.1) The demographic and clinical characteristics of both groups are demonstrated in Table 1.

The median (range) 24 hours morphine equivalent required in KET group was 0 (0-4.67) mg compared to 1 (0-6) mg in NS group ( $p=0.003$ ). Mean 24 hours morphine consumption were  $0.53 \pm 1.22$  mg in the KET group and  $1.58 \pm 1.87$  mg in the NS group (mean difference  $-1.05$  mg,  $p=0.004$ ). In PACU, the median (range) dose of fentanyl consumed was 0 (0-0)  $\mu$ g in parturients receiving ketamine versus 0 (0-20)  $\mu$ g in those receiving normal saline ( $p=0.01$ ). In the surgical unit, median morphine consumed was 0 (0-4) mg in the KET group and 0 (0-4) mg in the NS group ( $p=0.02$ ). Significant differences between the two groups in terms of postoperative pain scores at rest were observed only at 2 hours and 6 hours (Table 2). Likewise, the pain scores during movement between the two groups were significant at 2 hours and 6 hours after surgery (Table 2). However, after adjustment for multiplicity ( $p = 0.008$ ), the difference in the pain scores after surgery between the two groups was only significant at 2 hours at rest and 2 hours and 6 hours during movement (Table 2). The median (range) time to the first perception of pain in the KET group was 6 (1-12) hours whereas in the NS group this period was reduced to 2 (0.5-6) hours ( $p < 0.001$ ).

There were no significant differences in maternal adverse effects between the two groups (Table 3). In the KET group, one patient complained of diplopia and one patient manifested nystagmus. There were no cases of hallucination in either group. Neonatal outcomes were comparable between the two groups (Table 3). No neonatal deaths were observed.

## Discussion:

Our study showed that pre-incisional IV low dose ketamine reduced perioperative opioid requirement in patients undergoing non-elective CD under spinal anaesthesia as compared to the placebo. Lower pain scores were observed in the ketamine group as compared to the placebo at 2 and 6 hours postoperatively. In addition, the time to the first perception of pain was earlier in the normal saline group than the ketamine group.

There is little evidence to suggest that there is any difference in postoperative pain intensity between the elective and non-elective CD.<sup>14</sup> However, previous studies have shown that woman who had an emergency CD was more likely to encounter negative birth experience, high anxiety level and post-traumatic disorder than a woman who underwent elective CD.<sup>14-16</sup> Because there is a significant link between psychological distress and pain after surgery, focus on good quality perioperative analgesia during the non-elective CD is also needed. Therefore, we tested the analgesic role of ketamine in a non-elective CD because all previous studies were conducted in elective CD.

Opioids will continue to play an important role in perioperative pain management during CD; but because of several unwanted effects associated with its use, non-opioid analgesics are generally added.<sup>17,18</sup> Moreover, in resource-limited settings, longer-acting neuraxial opioids are less frequently used for post-CS analgesia because of their poor availability and lack of dedicated monitoring postoperatively.<sup>17</sup> In this regard, opioid-sparing agents such as ketamine may prove to be beneficial. Though ketamine is widely used as an anaesthetic induction agent, in recent times, its role has widened. Among several new indications, perioperative administration of low-dose systemic ketamine has demonstrated analgesic properties.<sup>6</sup>

1  
2  
3  
4 A sub-group study from a meta-analysis in 2015 that evaluated five trials performed under spinal  
5 anaesthesia for the elective CD found a significant reduction in cumulative morphine  
6 consumption with ketamine compared with the placebo group.<sup>19</sup> However, high heterogeneity  
7 was observed among the studies, and this was probably due to variation in ketamine regimen.  
8  
9 Two studies had used a pre-incisional single dose of 0.15 mg/kg ketamine and the other one had  
10 used a fixed dose of 30 mg, while the remaining two studies had continued the infusion of  
11 ketamine either until the end of surgery or up to 24 h postoperatively. We administered a single  
12 dose of 0.25 mg/kg ketamine immediately after spinal injection because bolus dose up to 1  
13 mg/kg IV is considered a sub-anaesthetic dose.<sup>20</sup> A recent meta-analysis also supported this fact  
14 where more than 50% of the studies included in the analysis had used doses of ketamine boluses  
15  $\leq 1\text{mg/kg}$ .<sup>6</sup>

16  
17  
18 We used IV ketamine before surgical incision, despite administration of spinal anaesthesia  
19 because pre-emptive administration of ketamine can block the development of central  
20 sensitization in the postoperative period. Moreover, the analgesic effect is maximized when pre-  
21 incision ketamine is given in conjunction with other analgesics such as opioids and local  
22 anaesthetics pre-emptively.<sup>21</sup> At a low bolus dose, ketamine produces analgesia by directly  
23 inhibiting NMDA receptors.<sup>20</sup> Intravenous single dose of ketamine has an elimination half-life of  
24 2–3 hours,<sup>22</sup> however, some traces of ketamine is still present 24 hours after injection.<sup>23</sup> In  
25 addition, an active metabolite of ketamine (norketamine) which also produces analgesia has slow  
26 elimination compared to its parent compound.<sup>22,23</sup> These are the likely reasons why a single dose  
27 of ketamine produces analgesia that may last beyond its elimination half-life.

28  
29  
30 Although we observed a statistically significant difference for the mean cumulative morphine  
31 requirement in the first 24 hours, it may be regarded as clinically insignificant because the mean

1  
2  
3  
4 difference was 1 mg. One reason for this small difference in overall opioid consumption and no  
5  
6 significant change in pain intensity in late hours is likely due to the use of multimodal analgesia.  
7  
8 In both the groups, we used IV paracetamol and ketorolac round the clock while an opioid was  
9  
10 used as rescue analgesia. Unlike other studies where a single bolus dose of pre-incisional  
11  
12 ketamine was administered, analgesics in the postoperative period were given only for  
13  
14 breakthrough pain.<sup>8,13</sup> As a result, in those studies, a larger difference in total morphine  
15  
16 equivalent consumption was observed that ranged from 2.11 mg to 6.8 mg. In another study,  
17  
18 contradict to our findings, low dose ketamine did not offer any postoperative benefits despite  
19  
20 using multimodal analgesia.<sup>7</sup> In the above study, IT morphine was administered, and therefore,  
21  
22 the prolonged analgesic effect of IT morphine could have overshadowed the analgesic effect of  
23  
24 ketamine.  
25  
26  
27  
28  
29

30 Several studies have explored the association between perioperative ketamine administration and  
31  
32 postoperative nausea and vomiting (PONV). In patients with high risk for PONV undergoing  
33  
34 lumbar spine surgery, ketamine increased the incidence of nausea.<sup>24</sup> The emetogenic effect of  
35  
36 ketamine is likely due to its inhibitory action on serotonin uptake at the synaptic terminal;  
37  
38 however, the precise mechanism remains elusive.<sup>25, 26</sup> Although we did not observe a significant  
39  
40 change in the incidence of PONV, the role of ketamine for PONV during CD is still uncertain.  
41  
42 While one study found a reduced incidence of intraoperative nausea and vomiting, another  
43  
44 showed an increased frequency of vomiting.<sup>27, 28</sup> As a result, there are assumptions made for and  
45  
46 against the role of ketamine on PONV: emetogenic versus opioid-sparing effects; whether a  
47  
48 reduction in the frequency of hypotension indirectly minimizes the PONV episodes. Because  
49  
50 PONV following spinal anaesthesia is multifactorial, it is difficult to establish a causal  
51  
52 relationship between ketamine and PONV. Nevertheless, large clinical trials are warranted  
53  
54  
55  
56  
57  
58  
59  
60

1  
2  
3  
4 before any conclusion can be drawn. Prophylactic use of low doses of ketamine is effective in  
5  
6 preventing shivering post-spinal anaesthesia for CD.<sup>29</sup> Although we found fewer parturients from  
7  
8 ketamine group required pethidine for shivering in comparison to normal saline group, the  
9  
10 difference was not significant statistically. The reason for this observation could be that our  
11  
12 study not powered enough to detect this difference.  
13  
14  
15

16 Ketamine crosses the placenta rapidly and has a mean fetal-maternal (F:M) ratio of 1.26  
17  
18 following an intravenous induction dose of anaesthesia.<sup>30</sup> As a result, concern has been  
19  
20 expressed as to whether or not ketamine administered in clinical doses at the time of delivery  
21  
22 produces neurotoxic effects in newborns. Animal studies have shown the dose and exposure  
23  
24 dependent effect of ketamine on the developing brain. A 5-h ketamine infusion in pregnant  
25  
26 rhesus female monkey produced neuronal apoptosis in the fetal brain;<sup>31</sup> On the other hand, no  
27  
28 serious complication was observed in lamb fetus after pregnant ewes were anaesthetized with 20  
29  
30 mg/kg of IV ketamine for CD.<sup>32</sup> Based on clinical studies, a meta-analysis on the role of  
31  
32 intravenous ketamine in parturients undergoing CD demonstrated no differences in the Apgar  
33  
34 scores of neonates between ketamine-treated and placebo group.<sup>19</sup> Likewise, ketamine  
35  
36 administered at 1 mg/kg IV in parturient did not worsen the newborn acid-base status in  
37  
38 comparison to either thiopentone anaesthesia or placebo group.<sup>33,34</sup> We too observed no  
39  
40 significant difference in neonatal outcomes between the two groups. As there is a paucity of data  
41  
42 related to the neurodevelopmental effects in neonates after exposure to ketamine during CD, it is  
43  
44 wise not to exceed ketamine doses above 1.5 mg/kg IV, and infusions are probably best avoided.  
45  
46  
47  
48  
49  
50

51 There are several limitations. First, the endpoint of the study was limited to postoperative 24  
52  
53 hours only. Second, we did not assess patient satisfaction and quality of recovery  
54  
55 postoperatively.  
56  
57  
58  
59  
60

1  
2  
3  
4 In conclusion, our findings indicate that administration of pre-incisional low dose ketamine  
5  
6 during non-elective caesarean delivery under spinal anaesthesia reduces perioperative overall  
7  
8 opioid requirement and lowers the pain scores in the early hours after surgery.  
9  
10  
11  
12  
13  
14  
15  
16  
17  
18  
19  
20  
21  
22  
23  
24  
25  
26  
27  
28  
29  
30  
31  
32  
33  
34  
35  
36  
37  
38  
39  
40  
41  
42  
43  
44  
45  
46  
47  
48  
49  
50  
51  
52  
53  
54  
55  
56  
57  
58  
59  
60

For peer review only

## References

1. Yost NP, Bloom SL, Sibley MK, Lo JY, McIntire DD, Leveno KJ. A hospital-sponsored quality improvement study of pain management after cesarean delivery. *Am J Obstet Gynecol.* 2004; **190**: 1341–6.
2. Kerai S, Saxena KN, Taneja B. Post-caesarean analgesia: What is new? *Indian J Anaesth.* 2017; **61**: 200–14.
3. Bell RF, Dahl JB, Moore RA, Kalso E. Perioperative ketamine for acute postoperative pain. *Cochrane Database Syst Rev.* 2006; **1**:CD004603.
4. Woolf CJ, Thompson SW. The induction and maintenance of central sensitization is dependent on N-methyl-d-aspartic acid receptor activation; implications for the treatment of post-injury pain hypersensitivity states. *Pain.* 1991; **44**: 293–9.
5. Pockett S. Spinal cord synaptic plasticity and chronic pain. *Anesth Analg.* 1995; **80**: 173–9.
6. Brinck EC, Tiippana E, Heesen M, *et al.* Perioperative intravenous ketamine for acute postoperative pain in adults. *Cochrane Database Syst Rev.* 2018; **12**: CD012033.
7. Bauchat JR, Higgins N, Wojciechowski KG, McCarthy RJ, Toledo P, Wong CA. Low-dose ketamine with multimodal postcesarean delivery analgesia: a randomized controlled trial. *Int J Obstet Anesth.* 2011; **20**: 3–9.
8. Menkiti ID, Desalu I, Kushimo OT. Low-dose intravenous ketamine improves postoperative analgesia after caesarean delivery with spinal bupivacaine in African parturients. *Int J Obstet Anesth.* 2012; **21**: 217-21.

- 1  
2  
3  
4 9. Yentis SM, Richards NA. Classification of urgency of caesarean section. *Obstet*  
5  
6 *Gynaecol Reprod Med.* 2008; 18: 139–40.  
7  
8
- 9 10. Telles-Correia D, Moreira AL, Gonçalves JS. Hallucinations and related concepts-their  
10  
11 conceptual background. *Front Psychol.* 2015; 6: 991.  
12  
13
- 14 11. Callesen T, Schouenborg L, Nielsen D, Guldager H, Kehlet H. Combined epidural–spinal  
15  
16 opioid-free anaesthesia and analgesia for hysterectomy. *Br J Anaesth.* 1999; 82: 881–5.  
17  
18
- 19 12. Tsai YC, Chu KS. A comparison of tramadol, amitriptyline, and meperidine for  
20  
21 postepidural anesthetic shivering in parturients. *Anesth Analg.* 2001; 93: 1288–92.  
22  
23
- 24 13. Behdad S, Hajiesmaeili MR, Abbasi HR, Ayatollahi V, Khadiv Z, Sedaghat A. Analgesic  
25  
26 effects of intravenous ketamine during spinal anesthesia in pregnant women undergone  
27  
28 caesarean section; a randomized clinical trial. *Anesth Pain Med.* 2013; 3: 230–3.  
29  
30
- 31 14. Karlström A, Engström-Olofsson R, Norbergh KG, Sjöling M, Hildingsson I.  
32  
33 Postoperative pain after cesarean birth affects breastfeeding and infant care. *J Obstet*  
34  
35 *Gynecol Neonatal Nurs.* 2007; 36: 430-440.  
36  
37
- 38 15. Gamble J, Creedy D. Psychological trauma symptoms of operative birth. *Brit J*  
39  
40 *Midwifery.* 2005; 13: 218–224.  
41  
42
- 43 16. Bansal T, Joon A. A comparative study to assess preoperative anxiety in obstetric  
44  
45 patients undergoing elective or emergency cesarean section. *Anaesth Pain & Intensive*  
46  
47 *Care* 2017;21(1):25-30  
48  
49
- 50 17. Bishop DG, Gibbs MW, Dyer RA. Post-caesarean delivery analgesia in resource-limited  
51  
52 settings: a narrative review. *Int J Obstet Anesth.* 2019; 40:119-27.  
53  
54  
55  
56  
57  
58  
59



- 1  
2  
3  
4 18. Hamburger J, Beilin Y. Systemic adjunct analgesics for cesarean delivery: a narrative  
5  
6 review. *Int J Obstet Anesth.* 2019; **40**:101-118.  
7  
8  
9 19. Heesen M, Böhmer J, Brinck EC, *et al.* Intravenous ketamine during spinal and general  
10  
11 anaesthesia for caesarean section: systematic review and meta-analysis. *Acta*  
12  
13 *Anaesthesiol Scand.* 2015; **59**: 414-26.  
14  
15  
16 20. Schmid RL, Sandler AN, Katz J. Use and efficacy of low-dose ketamine in the  
17  
18 management of acute postoperative pain: a review of current techniques and outcomes.  
19  
20 *Pain.* 1999; **82**: 111-25.  
21  
22  
23 21. Wong CS, Lu CC, Cherng CH, Ho ST. Pre-emptive analgesia with ketamine, morphine  
24  
25 and epidural lidocaine prior to total knee replacement. *Can J Anaesth.* 1997; **44**: 31-7.  
26  
27  
28 22. Mion G, Villeveille T. Ketamine pharmacology: an update (pharmacodynamics and  
29  
30 molecular aspects, recent findings). *CNS Neurosci Ther.* 2013; **19**: 370-80.  
31  
32  
33 23. Domino EF, Zsigmond EK, Domino LE, Domino KE, Kothary SP, Domino SE. Plasma  
34  
35 levels of ketamine and two of its metabolites in surgical patients using a gas  
36  
37 chromatographic mass fragmentographic assay. *Anesth Analg.* 1982; **61**: 87-92.  
38  
39  
40 24. Song JW, Shim JK, Song Y, Yang SY, Park SJ, Kwak YL. Effect of ketamine as an  
41  
42 adjunct to intravenous patient-controlled analgesia, in patients at high risk of  
43  
44 postoperative nausea and vomiting undergoing lumbar spinal surgery. *Br J Anaesth.*  
45  
46 2013; **111**: 630-5.  
47  
48  
49 25. Ghoneim MM, Hinrichs JV, Mewaldt SP, Petersen RC. Ketamine: behavioral effects of  
50  
51 subanesthetic doses. *J Clin Psychopharmacol.* 1985; **5**: 70-7.  
52  
53  
54  
55  
56  
57  
58  
59  
60

- 1  
2  
3  
4 26. Martin DC, Watkins CA, Adams RJ, Nason LA. Anesthetic effects on 5-  
5 hydroxytryptamine uptake by rat brain synaptosomes. *Brain Res.* 1988; **455**: 360–5.  
6  
7  
8  
9 27. Suppa E, Valente A, Catarci S, Zanfini BA, Draisci G. A study of low-dose S-ketamine  
10 infusion as "preventive" pain treatment for cesarean section with spinal anesthesia:  
11 benefits and side effects. *Minerva Anesthesiol.* 2012; **78**: 774-81.  
12  
13  
14  
15 28. Shabana AM, Nasr ES, Moawad HE. Effect of ketamine on intraoperative nausea and  
16 vomiting during elective caesarean section under spinal anaesthesia: A placebo-  
17 controlled prospective randomized double blinded study. *Egypt J Anaesth.* 2012; **28**:169–  
18 74.  
19  
20  
21  
22  
23  
24  
25  
26 29. Liu J, Wang Y, Ma W. Shivering prevention and treatment during cesarean delivery  
27 under neuraxial anesthesia: a systematic review. *Minerva Anesthesiol.* 2018; **84**:1393-405.  
28  
29  
30  
31 30. Ellingson A, Haram K, Sagen N, Solheim E. Transplacental passage of ketamine after  
32 intravenous administration. *Acta Anaesthesiol Scand.* 1977; **21**: 41–44.  
33  
34  
35  
36 31. Brambrink AM, Evers AS, Avidan MS, *et al.* Ketamine-induced neuroapoptosis in the  
37 fetal and neonatal rhesus macaque brain. *Anesthesiology.* 2012; **116**: 372-84.  
38  
39  
40  
41 32. Musk GC, Netto JD, Maker GL, Trengove RD. Transplacental transfer of medetomidine  
42 and ketamine in pregnant ewes. *Lab Anim.* 2012; **46**: 46–50.  
43  
44  
45  
46 33. Nayar R, Sahajanand H. Does anesthetic induction for cesarean section with a  
47 combination of ketamine and thiopentone confer any benefits over thiopentone or  
48 ketamine alone? A prospective randomized study. *Minerva Anesthesiol.* 2009; **75**:185-90.  
49  
50  
51  
52  
53  
54  
55  
56  
57  
58  
59  
60

- 1  
2  
3  
4 34. Maduska AL, Hajghassemali M. Arterial blood gases in mothers and infants during  
5  
6 ketamine anesthesia for vaginal delivery. *Anesth Analg*. 1978; **57**: 121-3.  
7  
8  
9  
10  
11  
12  
13  
14  
15  
16  
17  
18  
19  
20  
21  
22  
23  
24  
25  
26  
27  
28  
29  
30  
31  
32  
33  
34  
35  
36  
37  
38  
39  
40  
41  
42  
43  
44  
45  
46  
47  
48  
49  
50  
51  
52  
53  
54  
55  
56  
57  
58  
59  
60

**Table 1. Comparison of patient demographic, block characteristics and surgical profiles.**

| Variables                                      | KET group<br>n=40 | NS group<br>n=40 | p-value |
|------------------------------------------------|-------------------|------------------|---------|
| Age (in years)                                 | 24.90 ± 4.80      | 25.87 ± 5.53     | 0.40    |
| Height (in cm)                                 | 155.45 ± 3.75     | 156.82 ± 4.25    | 0.12    |
| Body mass index (in kg/m <sup>2</sup> )        | 25.47±2.18        | 26.27±3.16       | 0.19    |
| Gestational age (in weeks)                     | 38.77±1.36        | 38.8±1.69        | 0.94    |
| Indication for Cesarean section                |                   |                  | 0.65    |
| Non reassuring non-stress test                 | 11 (28)           | 16 (40)          |         |
| Previous CS presenting in labour               | 8 (20)            | 6 (15)           |         |
| Meconium stained liquor                        | 6 (15)            | 6 (15)           |         |
| Failed induction                               | 6 (15)            | 7 (17)           |         |
| Others (CPD, Malpresentation)                  | 9 (22)            | 5 (13)           |         |
| Onset block to T6 dermatome (in min)           | 2 (1-7)           | 2 (1-5)          | 0.23    |
| Highest sensory block (dermatome)              | T4 (T2-T4)        | T4 (T2-T4)       | 0.74    |
| Spinal injection to delivery interval (in min) | 20 (13-35)        | 19 (14-40)       | 0.65    |
| Intraoperative fentanyl needed (µg)            | 0 (0-0)           | 0 (0-40)         | 0.15    |

Values are expressed as mean ± SD, number (%), or median (range). CPD = Cephalopelvic disproportion

**Table 2. Comparison of pain scores between two groups.**

| <b>Time points</b>      | <b>KET group<br/>n=40</b> | <b>NS group<br/>n=40</b> | <b>p-value</b> |
|-------------------------|---------------------------|--------------------------|----------------|
| <i>At Rest</i>          |                           |                          |                |
| On arrival to PACU      | 0 (0-1)                   | 0 (0-4)                  | 0.15           |
| 1 h                     | 0 (0-2)                   | 0 (0-5)                  | 0.06           |
| 2 h                     | 0 (0-2)                   | 2 (0-5)                  | <0.001         |
| <i>In Surgical Unit</i> |                           |                          |                |
| 6 h                     | 2 (1-4)                   | 2 (0-5)                  | 0.02           |
| 12 h                    | 2 (0-4)                   | 2 (0-5)                  | 0.07           |
| 24 h                    | 2 (1-4)                   | 2 (0-5)                  | 0.23           |
| <i>During Movement</i>  |                           |                          |                |
| On arrival to PACU      | 0 (0-2)                   | 0 (0-5)                  | 0.08           |
| 1 h                     | 0 (0-3)                   | 1 (0-6)                  | 0.05           |
| 2 h                     | 2 (0-3)                   | 2 (0-5)                  | < 0.001        |
| <i>In Surgical Unit</i> |                           |                          |                |
| 6 h                     | 2 (0-4)                   | 3 (2-6)                  | 0.001          |
| 12 h                    | 3 (2-4)                   | 3 (2-6)                  | 0.22           |
| 24 h                    | 3 (2-6)                   | 3 (2-6)                  | 0.81           |

Values are expressed in median (range)

**Table 3. Maternal adverse effects and neonatal outcomes**

|                                            | <b>KET group</b> | <b>NS group</b> | <b><i>p</i>-value</b> |
|--------------------------------------------|------------------|-----------------|-----------------------|
|                                            | <b>n=40</b>      | <b>n=40</b>     |                       |
| Hypotension                                | 13 (32)          | 16 (40)         | 0.48                  |
| Nausea or vomiting                         | 4 (10)           | 5 (12)          | 0.72                  |
| Shivering requiring pethidine              | 5 (12)           | 8 (20)          | 0.36                  |
| APGAR score 1 min                          | 8 (6-8)          | 8 (6-8)         | 0.54                  |
| APGAR score 5 min                          | 9 (7-9)          | 9 (8-9)         | 0.67                  |
| Resuscitation needed in neonate (n)        | 1 (2%)           | 1 (2%)          | 1.0                   |
| Neonatal intensive care unit admission (n) | 1 (2%)           | 2 (5%)          | 1.0                   |

Values are in median (range) and number (percentage)

## Figure legends

Fig. 1 Consort flow diagram of the study.

## Authors' Contributions

Prahlad Adhikari: This author helped in study design, patient recruitment, data collection and writing up of the first draft of the paper

Asish Subedi: This author helped in study design, patient recruitment, analysis and interpretation of data, manuscript revision and final draft

Birendra Prasad Sah: This author helped in study design, data collection and manuscript revision.

Krishna Pokharel: This author helped in study design, patient recruitment and final draft

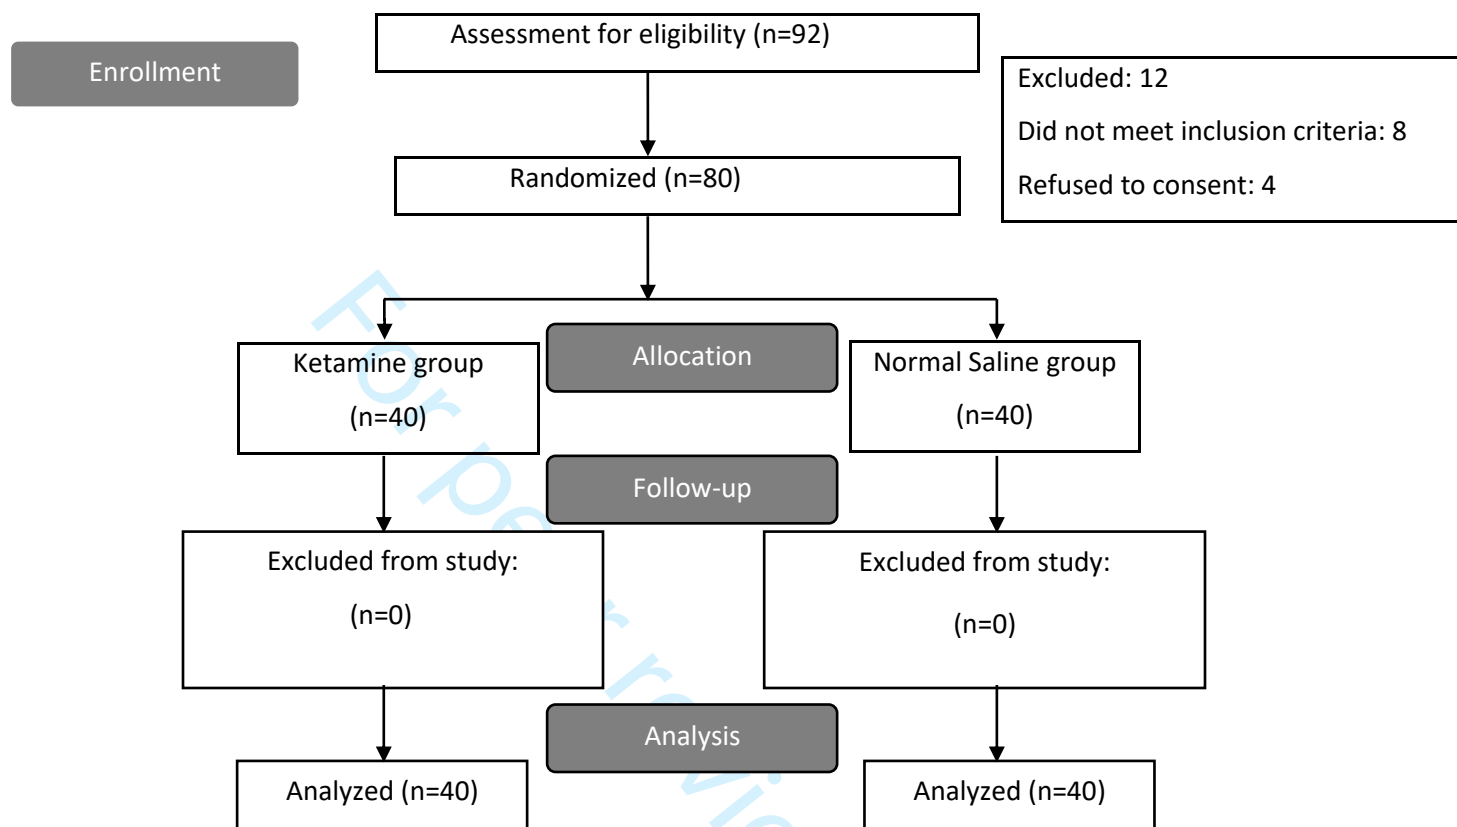



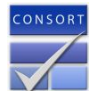

## CONSORT 2010 checklist of information to include when reporting a randomised trial\*

| Section/Topic                    | Item No | Checklist item                                                                                                                                                                              | Reported on page No |
|----------------------------------|---------|---------------------------------------------------------------------------------------------------------------------------------------------------------------------------------------------|---------------------|
| <b>Title and abstract</b>        |         |                                                                                                                                                                                             |                     |
|                                  | 1a      | Identification as a randomised trial in the title                                                                                                                                           | 1                   |
|                                  | 1b      | Structured summary of trial design, methods, results, and conclusions (for specific guidance see CONSORT for abstracts)                                                                     | 2,3                 |
| <b>Introduction</b>              |         |                                                                                                                                                                                             |                     |
| Background and objectives        | 2a      | Scientific background and explanation of rationale                                                                                                                                          | 4                   |
|                                  | 2b      | Specific objectives or hypotheses                                                                                                                                                           | 4                   |
| <b>Methods</b>                   |         |                                                                                                                                                                                             |                     |
| Trial design                     | 3a      | Description of trial design (such as parallel, factorial) including allocation ratio                                                                                                        | 5                   |
|                                  | 3b      | Important changes to methods after trial commencement (such as eligibility criteria), with reasons                                                                                          | N/A                 |
| Participants                     | 4a      | Eligibility criteria for participants                                                                                                                                                       | 5                   |
|                                  | 4b      | Settings and locations where the data were collected                                                                                                                                        | 5                   |
| Interventions                    | 5       | The interventions for each group with sufficient details to allow replication, including how and when they were actually administered                                                       | 6                   |
| Outcomes                         | 6a      | Completely defined pre-specified primary and secondary outcome measures, including how and when they were assessed                                                                          | 7,8                 |
|                                  | 6b      | Any changes to trial outcomes after the trial commenced, with reasons                                                                                                                       | N/A                 |
| Sample size                      | 7a      | How sample size was determined                                                                                                                                                              | 8                   |
|                                  | 7b      | When applicable, explanation of any interim analyses and stopping guidelines                                                                                                                | N/A                 |
| <b>Randomisation:</b>            |         |                                                                                                                                                                                             |                     |
| Sequence generation              | 8a      | Method used to generate the random allocation sequence                                                                                                                                      | 5                   |
|                                  | 8b      | Type of randomisation; details of any restriction (such as blocking and block size)                                                                                                         | 5                   |
| Allocation concealment mechanism | 9       | Mechanism used to implement the random allocation sequence (such as sequentially numbered containers), describing any steps taken to conceal the sequence until interventions were assigned | 5                   |
| Implementation                   | 10      | Who generated the random allocation sequence, who enrolled participants, and who assigned participants to interventions                                                                     | 5                   |
| Blinding                         | 11a     | If done, who was blinded after assignment to interventions (for example, participants, care providers, those                                                                                | 6                   |

|                                                      |     |                                                                                                                                                   |                                              |
|------------------------------------------------------|-----|---------------------------------------------------------------------------------------------------------------------------------------------------|----------------------------------------------|
|                                                      |     | assessing outcomes) and how                                                                                                                       |                                              |
|                                                      | 11b | If relevant, description of the similarity of interventions                                                                                       | 6                                            |
| Statistical methods                                  | 12a | Statistical methods used to compare groups for primary and secondary outcomes                                                                     | 8                                            |
|                                                      | 12b | Methods for additional analyses, such as subgroup analyses and adjusted analyses                                                                  | N/A                                          |
| <b>Results</b>                                       |     |                                                                                                                                                   |                                              |
| Participant flow (a diagram is strongly recommended) | 13a | For each group, the numbers of participants who were randomly assigned, received intended treatment, and were analysed for the primary outcome    | Figure 1                                     |
|                                                      | 13b | For each group, losses and exclusions after randomisation, together with reasons                                                                  | Figure 1                                     |
| Recruitment                                          | 14a | Dates defining the periods of recruitment and follow-up                                                                                           | 5,7                                          |
|                                                      | 14b | Why the trial ended or was stopped                                                                                                                | N/A                                          |
| Baseline data                                        | 15  | A table showing baseline demographic and clinical characteristics for each group                                                                  | Table 1                                      |
| Numbers analysed                                     | 16  | For each group, number of participants (denominator) included in each analysis and whether the analysis was by original assigned groups           | Figure 1                                     |
| Outcomes and estimation                              | 17a | For each primary and secondary outcome, results for each group, and the estimated effect size and its precision (such as 95% confidence interval) | Page 9.<br>Figure 2                          |
|                                                      | 17b | For binary outcomes, presentation of both absolute and relative effect sizes is recommended                                                       | Table 3                                      |
| Ancillary analyses                                   | 18  | Results of any other analyses performed, including subgroup analyses and adjusted analyses, distinguishing pre-specified from exploratory         | N/A                                          |
| Harms                                                | 19  | All important harms or unintended effects in each group (for specific guidance see CONSORT for harms)                                             | Table 3                                      |
| <b>Discussion</b>                                    |     |                                                                                                                                                   |                                              |
| Limitations                                          | 20  | Trial limitations, addressing sources of potential bias, imprecision, and, if relevant, multiplicity of analyses                                  | 11,12                                        |
| Generalisability                                     | 21  | Generalisability (external validity, applicability) of the trial findings                                                                         | 10-12                                        |
| Interpretation                                       | 22  | Interpretation consistent with results, balancing benefits and harms, and considering other relevant evidence                                     | 10-13                                        |
| <b>Other information</b>                             |     |                                                                                                                                                   |                                              |
| Registration                                         | 23  | Registration number and name of trial registry                                                                                                    | No.<br>NCT0345049<br>9.<br>clinicaltrial.gov |
| Protocol                                             | 24  | Where the full trial protocol can be accessed, if available                                                                                       | Enclosed as supplementary file               |

| Funding | 25 Sources of funding and other support (such as supply of drugs), role of funders | Non-funded |
|---------|------------------------------------------------------------------------------------|------------|
|---------|------------------------------------------------------------------------------------|------------|

\*We strongly recommend reading this statement in conjunction with the CONSORT 2010 Explanation and Elaboration for important clarifications on all the items. If relevant, we also recommend reading CONSORT extensions for cluster randomised trials, non-inferiority and equivalence trials, non-pharmacological treatments, herbal interventions, and pragmatic trials. Additional extensions are forthcoming: for those and for up to date references relevant to this checklist, see [www.consort-statement.org](http://www.consort-statement.org).

For peer review only

# BMJ Open

## Effects of Intravenous Ketamine after Spinal Anaesthesia for Non-Elective Caesarean Delivery: A Randomised Controlled Trial

|                                 |                                                                                                                                                                                                                                                                                                                                  |
|---------------------------------|----------------------------------------------------------------------------------------------------------------------------------------------------------------------------------------------------------------------------------------------------------------------------------------------------------------------------------|
| Journal:                        | <i>BMJ Open</i>                                                                                                                                                                                                                                                                                                                  |
| Manuscript ID                   | bmjopen-2020-044168.R2                                                                                                                                                                                                                                                                                                           |
| Article Type:                   | Original research                                                                                                                                                                                                                                                                                                                |
| Date Submitted by the Author:   | 23-May-2021                                                                                                                                                                                                                                                                                                                      |
| Complete List of Authors:       | Adhikari, Prahlad; Narayani Sub-regional Hospital Subedi, Asish; BP Koirala Institute of Health Sciences, Anesthesiology & Critical Care<br>Sah, Birendra; BP Koirala Institute of Health Sciences, Anesthesiology & Critical Care<br>Pokharel, Krishna; BP Koirala Institute of Health Sciences, Anesthesiology & Critical Care |
| <b>Primary Subject Heading</b>: | Anaesthesia                                                                                                                                                                                                                                                                                                                      |
| Secondary Subject Heading:      | Anaesthesia, Obstetrics and gynaecology                                                                                                                                                                                                                                                                                          |
| Keywords:                       | PAIN MANAGEMENT, Anaesthesia in obstetrics < ANAESTHETICS, Pain management < ANAESTHETICS                                                                                                                                                                                                                                        |
|                                 |                                                                                                                                                                                                                                                                                                                                  |

SCHOLARONE™  
Manuscripts

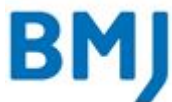

I, the Submitting Author has the right to grant and does grant on behalf of all authors of the Work (as defined in the below author licence), an exclusive licence and/or a non-exclusive licence for contributions from authors who are: i) UK Crown employees; ii) where BMJ has agreed a CC-BY licence shall apply, and/or iii) in accordance with the terms applicable for US Federal Government officers or employees acting as part of their official duties; on a worldwide, perpetual, irrevocable, royalty-free basis to BMJ Publishing Group Ltd ("BMJ") its licensees and where the relevant Journal is co-owned by BMJ to the co-owners of the Journal, to publish the Work in this journal and any other BMJ products and to exploit all rights, as set out in our [licence](#).

The Submitting Author accepts and understands that any supply made under these terms is made by BMJ to the Submitting Author unless you are acting as an employee on behalf of your employer or a postgraduate student of an affiliated institution which is paying any applicable article publishing charge ("APC") for Open Access articles. Where the Submitting Author wishes to make the Work available on an Open Access basis (and intends to pay the relevant APC), the terms of reuse of such Open Access shall be governed by a Creative Commons licence – details of these licences and which [Creative Commons](#) licence will apply to this Work are set out in our licence referred to above.

Other than as permitted in any relevant BMJ Author's Self Archiving Policies, I confirm this Work has not been accepted for publication elsewhere, is not being considered for publication elsewhere and does not duplicate material already published. I confirm all authors consent to publication of this Work and authorise the granting of this licence.

## Title page

### **Analgesic Effects of Intravenous Ketamine after Spinal Anaesthesia for Non-Elective Caesarean Delivery: A Randomised Controlled Trial**

#### **Authors**

Prahlad Adhikari<sup>1</sup>, Asish Subedi<sup>2</sup>, Birendra Prasad Sah<sup>2</sup>, Krishna Pokharel<sup>2</sup>

<sup>1</sup>Narayani Sub-regional Hospital, Birgunj, Parsa, Nepal

<sup>2</sup>Department of Anaesthesiology and Critical Care, Bisheshwar Prasad Koirala Institute of Health Sciences (BPKIHS), Dharan, Nepal

#### **Corresponding Author:**

Asish Subedi, MD

Department of Anaesthesiology & Critical Care

Bisheshwar Prasad Koirala Institute of Health Sciences (BPKIHS), Dharan, Nepal

E-mail address: asish\_subedi@alumni.harvard.edu, ashish.subedi@bpkihs.edu

Telephone number: Mobile- 977-9842040604

**Word count**, excluding title page, abstract, references, figures and tables: 3011

**Keywords:** Caesarean Delivery; Ketamine; Opioid; Postoperative pain.

## Abstract

**Objectives:** This study aimed to determine if low dose intravenous ketamine is effective in reducing opioid use and pain after non-elective caesarean delivery.

**Design:** Prospective, randomised, double-blind.

**Setting:** Tertiary hospital, BPKIHS, Dharan, Nepal

**Participants:** 80 patients undergoing non-elective caesarean section with spinal anaesthesia.

**Interventions:** Patients were allocated in 1:1 ratio to receive either intravenous ketamine 0.25 mg/kg or normal saline before the skin incision.

**Primary and secondary outcome measures:** The primary outcome was the total amount of morphine equivalents needed up to postoperative 24 hours. Secondary outcome measures were postoperative pain scores, time to the first perception of pain, maternal adverse effects (nausea, vomiting, hypotension, shivering, diplopia, nystagmus, hallucination) and neonatal Apgar score at 1 and 5 min, neonatal respiratory depression and neonatal intensive-care referral.

**Results:** The median (range) cumulative morphine consumption during the first 24 hours of surgery was 0 (0-4.67) mg in ketamine group and 1 (0-6) mg in saline group ( $p=0.003$ ). The median (range) time to the first perception of pain was 6 (1-12) hours and 2 (0.5-6) hours in ketamine and saline group respectively ( $p<0.001$ ). A significant reduction in postoperative pain scores was observed only at 2 hours and 6 hours in the ketamine group compared with placebo group ( $p<0.05$ ). Maternal adverse effects and neonatal outcomes were comparable between the two groups.

**Conclusions:** Intravenous administration of low dose ketamine before surgical incision significantly reduced the opioid requirement in the first 24 hours in patients undergoing non-elective caesarean delivery.

**Trial registration:** [clinicaltrials.gov](http://clinicaltrials.gov)- No. NCT03450499

1  
2  
3  
4 **Strengths and limitations of this study:**  
5

- 6
- 7 • The nature of the study design (RCT) allows a causal inference i.e. whether pre-incisional  
8 administration ketamine during caesarean delivery has opioid sparing effect.  
9
  - 10 • Due to the small sample size the findings cannot be generalized.  
11
  - 12 • The end point of the study was also limited to postoperative 24 hours only.  
13  
14  
15

16 **A funding statement:** This research received no specific grant from any funding agency in the  
17 public, commercial or not-for-profit sectors  
18  
19

20 **A competing interests statement:** None  
21

22 **Patient consent for publication:** Not required.  
23

24 **Ethics approval:** The study was approved by the Institutional Review Committee of BPKIHS  
25 (IRC #1089/017). All participants gave informed consent before taking part in the study.  
26  
27  
28

29 **Data availability statement:** Data are available upon request from the second author:  
30

31 asish\_subedi@alumni.harvard.edu  
32  
33  
34  
35  
36  
37  
38  
39  
40  
41  
42  
43  
44  
45  
46  
47  
48  
49  
50  
51  
52  
53  
54  
55  
56  
57  
58  
59  
60



## Introduction

Effective analgesia following caesarean delivery (CD) is important as it enhances maternal recovery, reduces the risk of deep vein thrombosis, and facilitates the mother's ability to care for her baby.<sup>1</sup> In recent years, both pharmacological and non-pharmacological modalities for post-caesarean analgesia have been extensively studied; yet, none of them are able to provide optimum post-operative analgesia.<sup>2</sup> Importantly, multimodal analgesia provides superior analgesia with fewer adverse effects related to opioids, and therefore, use of non-opioid analgesic in alleviating postoperative pain is generally preferred.<sup>2</sup> In this regard, opioid-sparing drugs, such as ketamine may be valuable in providing better analgesia without major adverse effects.<sup>3</sup>

Both central and peripheral mechanisms have been postulated for ketamine, as it not only abolishes peripheral afferent noxious stimuli but also prevents central sensitization.<sup>4, 5</sup> A recent meta-analysis demonstrated that perioperative administration of non-competitive N-methyl-D-aspartate (NMDA) receptor antagonist ketamine reduces postoperative pain intensity and analgesic consumption.<sup>6</sup>

Non-opioid analgesia plays a vital role in providing good quality analgesia during CD. The effect of ketamine on postoperative pain following spinal anaesthesia in an elective CD has been investigated.<sup>7, 8</sup> However, its analgesic role in a non-elective CD have not been explored to date. In this study, we examined the effect of low-dose intravenous (IV) ketamine on opioid requirement as morphine equivalent and pain intensity (as measured by numeric rating scale scores) following spinal anaesthesia for non-elective CD.

## Methods

This prospective, randomised, placebo-controlled, double-blind study was conducted at Bisheshwar Prasad Koirala Institute of Health Sciences (BPKIHS), Dharan, Nepal, between April 2, 2018, and March 7, 2019. This study was approved by the BPKIHS Institutional Review Committee (IRC #1089/017) and written informed consent was obtained from all subjects participating in the trial. The trial was registered prior to patient enrollment at [clinicaltrials.gov](http://clinicaltrials.gov) (NCT03450499, Principal investigator: Prahlad Adhikari, Date of registration: March 1, 2018). The study was conducted according to the ethical principles reported in the Declaration of Helsinki and adheres to the CONSORT (Consolidated Standards of Reporting Trials) statement.

Parturients at term undergoing non-elective, category 2 and 3 (according to NICE guideline classification of urgency of emergency caesarean),<sup>9</sup> lower segment CD under spinal anaesthesia with American Society of Anaesthesiologists physical status (ASA PS) II were eligible for this trial. Women with body mass index  $\geq 40$  kg/m<sup>2</sup>, height  $<150$  cm, current use of pain medication including opioids, history of substance abuse or hallucinations, cardiovascular disease, diabetes, multiple gestations, known fetal abnormality, chronic pain were excluded. Other exclusion criteria were contraindications to the spinal anaesthesia, severely compromised fetus requiring general anaesthesia and those patients who received labour analgesia.

Independent anaesthesia supporting staff randomly assigned the patients in a 1:1 ratio to receive either ketamine or normal saline using a computer-generated simple random sequence. The patient allocation was concealed in sealed opaque envelopes marked with the study identification number. The anaesthesia assistant who was not involved in the study opened the concealed envelope and prepared the study drug in a syringe according to the group allocation and labelled it. The study

1  
2  
3  
4 subject and the investigators assessing the outcome were blinded to the group assignment. Group  
5  
6 KET received IV ketamine (Ketamax<sup>®</sup>, Troikaa Pharmaceuticals Ltd, Gujarat, India) 0.25 mg/kg  
7  
8 and group NS received 0.9 % normal saline.  
9

10  
11 A total of 80 (40 in each group) patients was enrolled. Each eligible patient was informed about  
12  
13 the nature of the study in the labour room or emergency ward once the decision was made  
14  
15 regarding CD. Subsequently, written informed consent was obtained, and a pre-anaesthetic  
16  
17 checkup was done. During this visit, patients were also educated on the use of a 10-cm numeric  
18  
19 rating scale (NRS), with 0 representing no pain and 10 representing the worst imaginable pain. All  
20  
21 patients received IV metoclopramide 10 mg and ranitidine 50 mg for aspiration prophylaxis.  
22  
23 Patients were transferred to the operating room and standard monitoring was applied. An infusion  
24  
25 of Lactated Ringer's (RL) solution was initiated at a minimal rate via 18-gauge IV cannula placed  
26  
27 on the forearm.  
28  
29  
30  
31

32  
33 With the patient in an appropriate position, a 25 gauge Quincke needle was inserted at L3-4 or  
34  
35 L4-5 interspace; and intrathecal (IT) 2.2 ml of 0.5% heavy bupivacaine with 10 µg fentanyl was  
36  
37 administered. An anaesthesiologist who was unaware of the study group injected the spinal drug.  
38  
39 RL was administered at a rapid rate beginning at the time of the intrathecal injection. After noting  
40  
41 the time of injection, the patient was placed in a supine position with 15 degrees left tilt. The study  
42  
43 drug, according to the allocated group was injected intravenously just before the surgical incision.  
44  
45 Oxygen was administered via the face mask at the rate of 5 L/min.  
46  
47  
48

49  
50 The onset of a sensory block was assessed using alcohol-soaked cotton swabs. Initially, every  
51  
52 minute, the sensory block level was checked. When the sensory block reached the T6 level, surgery  
53  
54 was started. Intraoperative pain was managed with fentanyl 20 µg titrated to a maximum of 100  
55  
56  
57  
58  
59  
60

1  
2  
3  
4 µg by the attending anaesthesiologist. Intraoperative fall of systolic arterial pressure >20% of the  
5  
6 baseline or < 100 mmHg and heart rate (HR) < 50 beats/min were considered significant.  
7  
8 Hypotension was managed with increasing fluid administration (RL) rate and IV phenylephrine  
9  
10 50 µg (if HR>50 beats/min) or ephedrine 6 mg (if HR< 50 beats/min). Bradycardia (HR<50  
11  
12 beats/min) was managed with atropine 0.4 mg IV. Time from the spinal injection to the delivery  
13  
14 was noted. After the delivery of baby, 3 IU of oxytocin was administered IV over ≥ 30 secs  
15  
16 followed by an infusion of 10 IU/hr (oxytocin 40 IU in 500 ml of Hartmann's solution). Newborn  
17  
18 Apgar score was noted at 1 and 5 min after birth. Both groups received 1 g IV paracetamol every  
19  
20 6 hours and 30 mg IV ketorolac every 8 hours starting at the end of surgery.  
21  
22  
23  
24

25 Postoperative pain was evaluated using NRS at rest and on an attempt to move or bend forward  
26  
27 from the bed. During the stay at the postanesthesia care unit (PACU; On arrival, 1 and 2 hours  
28  
29 thereafter), if NRS score was >3, the patient received IV fentanyl 15 µg, and it was repeated every  
30  
31 5 minutes until NRS was ≤ 3. In the post-operative ward (6, 12, and 24 hours) IV morphine 2 mg  
32  
33 was administered for NRS score >3, and it was repeated until NRS ≤ 3.  
34  
35  
36

37 The primary outcome was the total consumption of opioids as morphine equivalents up to 24 hours  
38  
39 after surgery. Secondary outcomes were postoperative pain scores at rest and on movement; time  
40  
41 to the first perception of pain (in hours); maternal adverse effects (incidence of nausea, vomiting,  
42  
43 shivering, diplopia, nystagmus, hallucination); neonatal Apgar scores; neonates requiring  
44  
45 resuscitation and intensive-care admission. Maternal adverse effects were noted intraoperatively  
46  
47 and up to 24 hours after surgery. Presence of hallucination was based on a criterion of verbally  
48  
49 reporting of sensory experiences with or without intuition and not triggered by a relevant  
50  
51 stimulus.<sup>10</sup> Nausea and vomiting were rated on a scale of 0 to 3 (0, No nausea, no vomiting, 1  
52  
53 Light nausea, no vomiting episodes, 2 Moderate nausea, one or two vomiting episodes, 3 severe  
54  
55  
56  
57  
58  
59  
60

1  
2  
3  
4 nausea, three or more vomiting episodes).<sup>11</sup> IV Ondansetron 4 mg was given when the score was  
5  
6  $\geq 2$ . Shivering was graded using a scale described by Tsai and Chu.<sup>12</sup> Pethidine 20 mg was  
7  
8 administered IV if shivering involved the whole body. The equivalent dose of fentanyl consumed  
9  
10 (intraoperative and PACU) for pain and pethidine needed for shivering was converted to morphine  
11  
12 from an online dose equivalent calculator ([www.globalrph.com/medcalcs/opioid-pain-  
13  
14  
15  
16  
17  
18  
19  
20  
21  
22  
23  
24  
25  
26  
27  
28  
29  
30  
31  
32  
33  
34  
35  
36  
37  
38  
39  
40  
41  
42  
43  
44  
45  
46  
47  
48  
49  
50  
51  
52  
53  
54  
55  
56  
57  
58  
59  
60](http://www.globalrph.com/medcalcs/opioid-pain-management-converter-advanced)  
[management-converter-advanced](http://www.globalrph.com/medcalcs/opioid-pain-management-converter-advanced)).

### Statistical analysis:

The data collected in the case report form were entered in the Microsoft Excel 2016 software. All analysis was conducted using STATA software version 15 (Stata Corporation, College Station, TX, USA). Normality of the data was checked using histogram, Kurtosis Skewness test and Sapiro Wilk test. Parametric data were presented as mean  $\pm$  standard deviation and non-parametric data as median (range). For the normally distributed data, Student *t*-test and for the non-normally distributed data, Mann-Whitney *U* test were applied. The categorical data were compared using the chi-square test or Fisher exact test as appropriate. Post-hoc analysis using the Bonferroni correction was applied for comparisons of postoperative pain scores between the two groups. For this, an adjustment of the alpha value was made as 0.05 divided by six-time points of assessment, i.e.  $0.05/6 = 0.008$ .

### Sample size

The sample size was calculated based on a previous study,<sup>13</sup> which showed a mean  $\pm$  SD consumption of pethidine in the ketamine group as  $54.17 \pm 12.86$  mg and  $74.44 \pm 33.82$  mg in the placebo group. To detect this difference, assuming  $\alpha = 0.05$  and  $\beta = 0.1$  (90% power) and using the 2-tailed Student *t*-test, 34 subjects were required in each group (STATA version 15, Stata

1  
2  
3  
4 Corporation, College Station, TX, USA). Finally, forty patients were assigned to each group to  
5  
6 allow for possible dropouts.  
7

### 8 9 **Patient and Public Involvement**

10  
11  
12 Patients or the public were not involved in the design, or conduct, or reporting, or dissemination  
13  
14 plans of our research.  
15  
16  
17  
18  
19  
20  
21  
22  
23  
24  
25  
26  
27  
28  
29  
30  
31  
32  
33  
34  
35  
36  
37  
38  
39  
40  
41  
42  
43  
44  
45  
46  
47  
48  
49  
50  
51  
52  
53  
54  
55  
56  
57  
58  
59  
60

## Results

Among 92 women eligible for the study, 80 were enrolled, as eight subjects did not meet the inclusion criteria and four refused to give consent. (Fig.1) The demographic and clinical characteristics of both groups are demonstrated in Table 1.

The median (range) 24 hours morphine equivalent required in KET group was 0 (0-4.67) mg compared to 1 (0-6) mg in NS group ( $p=0.003$ ) (Fig. 2). Mean 24 hours morphine consumption were  $0.53 \pm 1.22$  mg in the KET group and  $1.58 \pm 1.87$  mg in the NS group (mean difference – 1.05 mg,  $p=0.004$ ). In PACU, the median (range) dose of fentanyl consumed was 0 (0-0)  $\mu$ g in parturients receiving ketamine versus 0 (0-20)  $\mu$ g in those receiving normal saline ( $p=0.01$ ). In the surgical unit, median morphine consumed was 0 (0-4) mg in the KET group and 0 (0-4) mg in the NS group ( $p=0.02$ ). Significant differences between the two groups in terms of postoperative pain scores at rest were observed only at 2 hours and 6 hours (Fig. 3). Likewise, the pain scores during movement between the two groups were significant at 2 hours and 6 hours after surgery (Fig. 4). However, after adjustment for multiplicity ( $p = 0.008$ ), the difference in the pain scores after surgery between the two groups was only significant at 2 hours at rest and 2 hours and 6 hours during movement (Fig. 3 & Fig. 4). The median (range) time to the first perception of pain in the KET group was 6 (1-12) hours whereas in the NS group this period was reduced to 2 (0.5-6) hours ( $p < 0.001$ ).

There were no significant differences in maternal adverse effects between the two groups (Table 2). In the KET group, one patient complained of diplopia and one patient manifested nystagmus. There were no cases of hallucination in either group. Neonatal outcomes were comparable between the two groups (Table 2). No neonatal deaths were observed.

## Discussion:

Our study showed that pre-incisional IV low dose ketamine reduced perioperative opioid requirement in patients undergoing non-elective CD under spinal anaesthesia as compared to the placebo. Lower pain scores were observed in the ketamine group as compared to the placebo at 2 and 6 hours postoperatively. In addition, the time to the first perception of pain was earlier in the normal saline group than the ketamine group.

There is little evidence to suggest that there is any difference in postoperative pain intensity between the elective and non-elective CD.<sup>14</sup> However, previous studies have shown that woman who had an emergency CD was more likely to encounter negative birth experience, high anxiety level and post-traumatic disorder than a woman who underwent elective CD.<sup>14-16</sup> Because there is a significant link between psychological distress and pain after surgery, focus on good quality perioperative analgesia during the non-elective CD is also needed. Therefore, we tested the analgesic role of ketamine in a non-elective CD because all previous studies were conducted in elective CD.

Opioids will continue to play an important role in perioperative pain management during CD; but because of several unwanted effects associated with its use, non-opioid analgesics are generally added.<sup>17,18</sup> Moreover, in resource-limited settings, longer-acting neuraxial opioids are less frequently used for post-CS analgesia because of their poor availability and lack of dedicated monitoring postoperatively.<sup>17</sup> In this regard, opioid-sparing agents such as ketamine may prove to be beneficial. Though ketamine is widely used as an anaesthetic induction agent, in recent times, its role has widened. Among several new indications, perioperative administration of low-dose systemic ketamine has demonstrated analgesic properties.<sup>6</sup>



1  
2  
3  
4 A sub-group study from a meta-analysis in 2015 that evaluated five trials performed under spinal  
5 anaesthesia for the elective CD found a significant reduction in cumulative morphine consumption  
6 with ketamine compared with the placebo group.<sup>19</sup> However, high heterogeneity was observed  
7 among the studies, and this was probably due to variation in ketamine regimen. Two studies had  
8 used a pre-incisional single dose of 0.15 mg/kg ketamine and the other one had used a fixed dose  
9 of 30 mg, while the remaining two studies had continued the infusion of ketamine either until the  
10 end of surgery or up to 24 h postoperatively. We administered a single dose of 0.25 mg/kg  
11 ketamine immediately after spinal injection because bolus dose up to 1 mg/kg IV is considered a  
12 sub-anaesthetic dose.<sup>20</sup> A recent meta-analysis also supported this fact where more than 50% of  
13 the studies included in the analysis had used doses of ketamine boluses  $\leq 1$ mg/kg.<sup>6</sup>  
14  
15  
16  
17  
18  
19  
20  
21  
22  
23  
24  
25  
26

27 We used IV ketamine before surgical incision, despite administration of spinal anaesthesia because  
28 pre-emptive administration of ketamine can block the development of central sensitization in the  
29 postoperative period. Moreover, the analgesic effect is maximized when pre-incision ketamine is  
30 given in conjunction with other analgesics such as opioids and local anaesthetics pre-emptively.<sup>21</sup>  
31 At a low bolus dose, ketamine produces analgesia by directly inhibiting NMDA receptors.<sup>20</sup>  
32 Intravenous single dose of ketamine has an elimination half-life of 2–3 hours,<sup>22</sup> however, some  
33 traces of ketamine is still present 24 hours after injection.<sup>23</sup> In addition, an active metabolite of  
34 ketamine (norketamine) which also produces analgesia has slow elimination compared to its parent  
35 compound.<sup>22,23</sup> These are the likely reasons why a single dose of ketamine produces analgesia that  
36 may last beyond its elimination half-life.  
37  
38  
39  
40  
41  
42  
43  
44  
45  
46  
47  
48  
49  
50

51 Although we observed a statistically significant difference for the mean cumulative morphine  
52 requirement in the first 24 hours, it may be regarded as clinically insignificant because the mean  
53 difference was 1 mg. One reason for this small difference in overall opioid consumption and no  
54  
55  
56  
57  
58  
59  
60

1  
2  
3  
4 significant change in pain intensity in late hours is likely due to the use of multimodal analgesia.

5  
6 In both the groups, we used IV paracetamol and ketorolac round the clock while an opioid was  
7  
8 used as rescue analgesia. Unlike other studies where a single bolus dose of pre-incisional ketamine  
9  
10 was administered, analgesics in the postoperative period were given only for breakthrough pain.<sup>8,13</sup>  
11  
12 As a result, in those studies, a larger difference in total morphine equivalent consumption was  
13  
14 observed that ranged from 2.11 mg to 6.8 mg. In another study, contradict to our findings, low  
15  
16 dose ketamine did not offer any postoperative benefits despite using multimodal analgesia.<sup>7</sup> In the  
17  
18 above study, IT morphine was administered, and therefore, the prolonged analgesic effect of IT  
19  
20 morphine could have overshadowed the analgesic effect of ketamine.  
21  
22  
23  
24

25 Several studies have explored the association between perioperative ketamine administration and  
26  
27 postoperative nausea and vomiting (PONV). In patients with high risk for PONV undergoing  
28  
29 lumbar spine surgery, ketamine increased the incidence of nausea.<sup>24</sup> The emetogenic effect of  
30  
31 ketamine is likely due to its inhibitory action on serotonin uptake at the synaptic terminal; however,  
32  
33 the precise mechanism remains elusive.<sup>25, 26</sup> Although we did not observe a significant change in  
34  
35 the incidence of PONV, the role of ketamine for PONV during CD is still uncertain. While one  
36  
37 study found a reduced incidence of intraoperative nausea and vomiting, another showed an  
38  
39 increased frequency of vomiting.<sup>27, 28</sup> As a result, there are assumptions made for and against the  
40  
41 role of ketamine on PONV: emetogenic versus opioid-sparing effects; whether a reduction in the  
42  
43 frequency of hypotension indirectly minimizes the PONV episodes. Because PONV following  
44  
45 spinal anaesthesia is multifactorial, it is difficult to establish a causal relationship between  
46  
47 ketamine and PONV. Nevertheless, large clinical trials are warranted before any conclusion can  
48  
49 be drawn. Prophylactic use of low doses of ketamine is effective in preventing shivering post-  
50  
51 spinal anaesthesia for CD.<sup>29</sup> Although we found fewer parturients from ketamine group required  
52  
53  
54  
55  
56  
57  
58  
59  
60

1  
2  
3  
4 pethidine for shivering in comparison to normal saline group, the difference was not significant  
5  
6 statistically. The reason for this observation could be that our study not powered enough to detect  
7  
8 this difference.  
9

10  
11 Ketamine crosses the placenta rapidly and has a mean fetal-maternal (F:M) ratio of 1.26 following  
12  
13 an intravenous induction dose of anaesthesia.<sup>30</sup> As a result, concern has been expressed as to  
14  
15 whether or not ketamine administered in clinical doses at the time of delivery produces neurotoxic  
16  
17 effects in newborns. Animal studies have shown the dose and exposure dependent effect of  
18  
19 ketamine on the developing brain. A 5-h ketamine infusion in pregnant rhesus female monkey  
20  
21 produced neuronal apoptosis in the fetal brain;<sup>31</sup> On the other hand, no serious complication was  
22  
23 observed in lamb fetus after pregnant ewes were anaesthetized with 20 mg/kg of IV ketamine for  
24  
25 CD.<sup>32</sup> Based on clinical studies, a meta-analysis on the role of intravenous ketamine in parturients  
26  
27 undergoing CD demonstrated no differences in the Apgar scores of neonates between ketamine-  
28  
29 treated and placebo group.<sup>19</sup> Likewise, ketamine administered at 1 mg/kg IV in parturient did not  
30  
31 worsen the newborn acid-base status in comparison to either thiopentone anaesthesia or placebo  
32  
33 group.<sup>33,34</sup> We too observed no significant difference in neonatal outcomes between the two  
34  
35 groups. As there is a paucity of data related to the neurodevelopmental effects in neonates after  
36  
37 exposure to ketamine during CD, it is wise not to exceed ketamine doses above 1.5 mg/kg IV, and  
38  
39 infusions are probably best avoided.  
40  
41  
42  
43  
44  
45

46 There are several limitations. First, the endpoint of the study was limited to postoperative 24 hours  
47  
48 only. Second, we did not assess patient satisfaction and quality of recovery postoperatively.  
49  
50  
51  
52  
53  
54  
55  
56  
57  
58  
59  
60

1  
2  
3  
4 In conclusion, our findings indicate that administration of pre-incisional low dose ketamine during  
5 non-elective caesarean delivery under spinal anaesthesia reduces perioperative overall opioid  
6 requirement and lowers the pain scores in the early hours after surgery.  
7  
8  
9

10  
11  
12  
13  
14  
15  
16  
17  
18  
19  
20  
21  
22  
23  
24  
25  
26  
27  
28  
29  
30  
31  
32  
33  
34  
35  
36  
37  
38  
39  
40  
41  
42  
43  
44  
45  
46  
47  
48  
49  
50  
51  
52  
53  
54  
55  
56  
57  
58  
59  
60

For peer review only

## References

1. Yost NP, Bloom SL, Sibley MK, Lo JY, McIntire DD, Leveno KJ. A hospital-sponsored quality improvement study of pain management after cesarean delivery. *Am J Obstet Gynecol.* 2004; **190**: 1341–6.
2. Kerai S, Saxena KN, Taneja B. Post-caesarean analgesia: What is new? *Indian J Anaesth.* 2017; **61**: 200–14.
3. Bell RF, Dahl JB, Moore RA, Kalso E. Perioperative ketamine for acute postoperative pain. *Cochrane Database Syst Rev.* 2006; **1**:CD004603.
4. Woolf CJ, Thompson SW. The induction and maintenance of central sensitization is dependent on N-methyl-d-aspartic acid receptor activation; implications for the treatment of post-injury pain hypersensitivity states. *Pain.* 1991; **44**: 293–9.
5. Pockett S. Spinal cord synaptic plasticity and chronic pain. *Anesth Analg.* 1995; **80**: 173–9.
6. Brinck EC, Tiippana E, Heesen M, *et al.* Perioperative intravenous ketamine for acute postoperative pain in adults. *Cochrane Database Syst Rev.* 2018; **12**: CD012033.
7. Bauchat JR, Higgins N, Wojciechowski KG, McCarthy RJ, Toledo P, Wong CA. Low-dose ketamine with multimodal postcesarean delivery analgesia: a randomized controlled trial. *Int J Obstet Anesth.* 2011; **20**: 3–9.
8. Menkiti ID, Desalu I, Kushimo OT. Low-dose intravenous ketamine improves postoperative analgesia after caesarean delivery with spinal bupivacaine in African parturients. *Int J Obstet Anesth.* 2012; **21**: 217-21.

- 1  
2  
3  
4 9. Yentis SM, Richards NA. Classification of urgency of caesarean section. *Obstet Gynaecol*  
5  
6 *Reprod Med.* 2008; 18: 139–40.  
7  
8
- 9 10. Telles-Correia D, Moreira AL, Gonçalves JS. Hallucinations and related concepts-their  
10  
11 conceptual background. *Front Psychol.* 2015; 6: 991.  
12  
13
- 14 11. Callesen T, Schouenborg L, Nielsen D, Guldager H, Kehlet H. Combined epidural–spinal  
15  
16 opioid-free anaesthesia and analgesia for hysterectomy. *Br J Anaesth.* 1999; 82: 881–5.  
17  
18
- 19 12. Tsai YC, Chu KS. A comparison of tramadol, amitriptyline, and meperidine for  
20  
21 postepidural anesthetic shivering in parturients. *Anesth Analg.* 2001; 93: 1288–92.  
22  
23
- 24 13. Behdad S, Hajiesmaeili MR, Abbasi HR, Ayatollahi V, Khadiv Z, Sedaghat A. Analgesic  
25  
26 effects of intravenous ketamine during spinal anesthesia in pregnant women undergone  
27  
28 caesarean section; a randomized clinical trial. *Anesth Pain Med.* 2013; 3: 230–3.  
29  
30
- 31 14. Karlström A, Engström-Olofsson R, Norbergh KG, Sjöling M, Hildingsson I.  
32  
33 Postoperative pain after cesarean birth affects breastfeeding and infant care. *J Obstet*  
34  
35 *Gynecol Neonatal Nurs.* 2007; 36: 430-440.  
36  
37
- 38 15. Gamble J, Creedy D. Psychological trauma symptoms of operative birth. *Brit J Midwifery.*  
39  
40 2005; 13: 218–224.  
41  
42  
43  
44
- 45 16. Bansal T, Joon A. A comparative study to assess preoperative anxiety in obstetric patients  
46  
47 undergoing elective or emergency cesarean section. *Anaesth Pain & Intensive Care*  
48  
49 2017;21(1):25-30  
50  
51
- 52 17. Bishop DG, Gibbs MW, Dyer RA. Post-caesarean delivery analgesia in resource-limited  
53  
54 settings: a narrative review. *Int J Obstet Anesth.* 2019; 40:119-27.  
55  
56  
57  
58  
59

18. Hamburger J, Beilin Y. Systemic adjunct analgesics for cesarean delivery: a narrative review. *Int J Obstet Anesth.* 2019; **40**:101-118.
19. Heesen M, Böhmer J, Brinck EC, *et al.* Intravenous ketamine during spinal and general anaesthesia for caesarean section: systematic review and meta-analysis. *Acta Anaesthesiol Scand.* 2015; **59**: 414-26.
20. Schmid RL, Sandler AN, Katz J. Use and efficacy of low-dose ketamine in the management of acute postoperative pain: a review of current techniques and outcomes. *Pain.* 1999; **82**: 111-25.
21. Wong CS, Lu CC, Cherng CH, Ho ST. Pre-emptive analgesia with ketamine, morphine and epidural lidocaine prior to total knee replacement. *Can J Anaesth.* 1997; **44**: 31-7.
22. Mion G, Villevieille T. Ketamine pharmacology: an update (pharmacodynamics and molecular aspects, recent findings). *CNS Neurosci Ther.* 2013; **19**: 370-80.
23. Domino EF, Zsigmond EK, Domino LE, Domino KE, Kothary SP, Domino SE. Plasma levels of ketamine and two of its metabolites in surgical patients using a gas chromatographic mass fragmentographic assay. *Anesth Analg.* 1982; **61**: 87-92.
24. Song JW, Shim JK, Song Y, Yang SY, Park SJ, Kwak YL. Effect of ketamine as an adjunct to intravenous patient-controlled analgesia, in patients at high risk of postoperative nausea and vomiting undergoing lumbar spinal surgery. *Br J Anaesth.* 2013; **111**: 630-5.
25. Ghoneim MM, Hinrichs JV, Mewaldt SP, Petersen RC. Ketamine: behavioral effects of subanesthetic doses. *J Clin Psychopharmacol.* 1985; **5**: 70-7.

- 1  
2  
3  
4 26. Martin DC, Watkins CA, Adams RJ, Nason LA. Anesthetic effects on 5-  
5 hydroxytryptamine uptake by rat brain synaptosomes. *Brain Res.* 1988; **455**: 360–5.  
6  
7  
8  
9 27. Suppa E, Valente A, Catarci S, Zanfini BA, Draisci G. A study of low-dose S-ketamine  
10 infusion as "preventive" pain treatment for cesarean section with spinal anesthesia: benefits  
11 and side effects. *Minerva Anesthesiol.* 2012; **78**: 774-81.  
12  
13  
14  
15 28. Shabana AM, Nasr ES, Moawad HE. Effect of ketamine on intraoperative nausea and  
16 vomiting during elective caesarean section under spinal anaesthesia: A placebo-controlled  
17 prospective randomized double blinded study. *Egypt J Anaesth.* 2012; **28**:169–74.  
18  
19  
20  
21 29. Liu J, Wang Y, Ma W. Shivering prevention and treatment during cesarean delivery under  
22 neuraxial anesthesia: a systematic review. *Minerva Anesthesiol.* 2018; **84**:1393-405.  
23  
24  
25  
26 30. Ellingson A, Haram K, Sagen N, Solheim E. Transplacental passage of ketamine after  
27 intravenous administration. *Acta Anaesthesiol Scand.* 1977; **21**: 41–44.  
28  
29  
30  
31 31. Brambrink AM, Evers AS, Avidan MS, *et al.* Ketamine-induced neuroapoptosis in the fetal  
32 and neonatal rhesus macaque brain. *Anesthesiology.* 2012; **116**: 372-84.  
33  
34  
35  
36 32. Musk GC, Netto JD, Maker GL, Trengove RD. Transplacental transfer of medetomidine  
37 and ketamine in pregnant ewes. *Lab Anim.* 2012; **46**: 46–50.  
38  
39  
40  
41 33. Nayar R, Sahajanand H. Does anesthetic induction for cesarean section with a combination  
42 of ketamine and thiopentone confer any benefits over thiopentone or ketamine alone? A  
43 prospective randomized study. *Minerva Anesthesiol.* 2009; **75**:185-90.  
44  
45  
46  
47 34. Maduska AL, Hajghassemali M. Arterial blood gases in mothers and infants during  
48 ketamine anesthesia for vaginal delivery. *Anesth Analg.* 1978; **57**: 121-3.  
49  
50  
51  
52  
53  
54  
55  
56  
57  
58  
59  
60



**Table 1. Comparison of patient demographic, block characteristics and surgical profiles.**

| Variables                                      | KET group<br>n=40 | NS group<br>n=40 | p-value |
|------------------------------------------------|-------------------|------------------|---------|
| Age (in years)                                 | 24.90 ± 4.80      | 25.87 ± 5.53     | 0.40    |
| Height (in cm)                                 | 155.45 ± 3.75     | 156.82 ± 4.25    | 0.12    |
| Body mass index (in kg/m <sup>2</sup> )        | 25.47±2.18        | 26.27±3.16       | 0.19    |
| Gestational age (in weeks)                     | 38.77±1.36        | 38.8±1.69        | 0.94    |
| Indication for Cesarean section                |                   |                  | 0.65    |
| Non reassuring non-stress test                 | 11 (28)           | 16 (40)          |         |
| Previous CS presenting in labour               | 8 (20)            | 6 (15)           |         |
| Meconium stained liquor                        | 6 (15)            | 6 (15)           |         |
| Failed induction                               | 6 (15)            | 7 (17)           |         |
| Others (CPD, Malpresentation)                  | 9 (22)            | 5 (13)           |         |
| Onset block to T6 dermatome (in min)           | 2 (1-7)           | 2 (1-5)          | 0.23    |
| Highest sensory block (dermatome)              | T4 (T2-T4)        | T4 (T2-T4)       | 0.74    |
| Spinal injection to delivery interval (in min) | 20 (13-35)        | 19 (14-40)       | 0.65    |
| Intraoperative fentanyl needed (µg)            | 0 (0-0)           | 0 (0-40)         | 0.15    |

Values are expressed as mean ± SD, number (%), or median (range). CPD = Cephalopelvic disproportion

**Table 2. Maternal adverse effects and neonatal outcomes**

|                                            | <b>KET group</b> | <b>NS group</b> | <b><i>p</i>-value</b> |
|--------------------------------------------|------------------|-----------------|-----------------------|
|                                            | <b>n=40</b>      | <b>n=40</b>     |                       |
| Hypotension                                | 13 (32)          | 16 (40)         | 0.48                  |
| Nausea or vomiting                         | 4 (10)           | 5 (12)          | 0.72                  |
| Shivering requiring pethidine              | 5 (12)           | 8 (20)          | 0.36                  |
| APGAR score 1 min                          | 8 (6-8)          | 8 (6-8)         | 0.54                  |
| APGAR score 5 min                          | 9 (7-9)          | 9 (8-9)         | 0.67                  |
| Resuscitation needed in neonate (n)        | 1 (2%)           | 1 (2%)          | 1.0                   |
| Neonatal intensive care unit admission (n) | 1 (2%)           | 2 (5%)          | 1.0                   |

Values are in median (range) and number (percentage)

### Figure legends

Fig. 1 Consort flow diagram of the study.

Fig. 2 Total morphine equivalent for 24 h postoperatively in patients receiving ketamine and saline.

Fig. 3 Postoperative numerical rating pain (NRS) scores at various time points at rest. After adjustment for multiplicity significant difference between the groups was detected at 2 hours ( $\ast p < 0.05$ ).

Fig. 4 Postoperative numerical rating pain (NRS) scores at various time points during movement. After adjustment for multiplicity significant difference between the groups was detected at 2 hours and 6 hours ( $\ast p < 0.05$ ).

### Authors' Contributions

Prahlad Adhikari: This author helped in study design, patient recruitment, data collection and writing up of the first draft of the paper

Asish Subedi: This author helped in study design, patient recruitment, analysis and interpretation of data, manuscript revision and final draft

Birendra Prasad Sah: This author helped in study design, data collection and manuscript revision.

Krishna Pokharel: This author helped in study design, patient recruitment and final draft

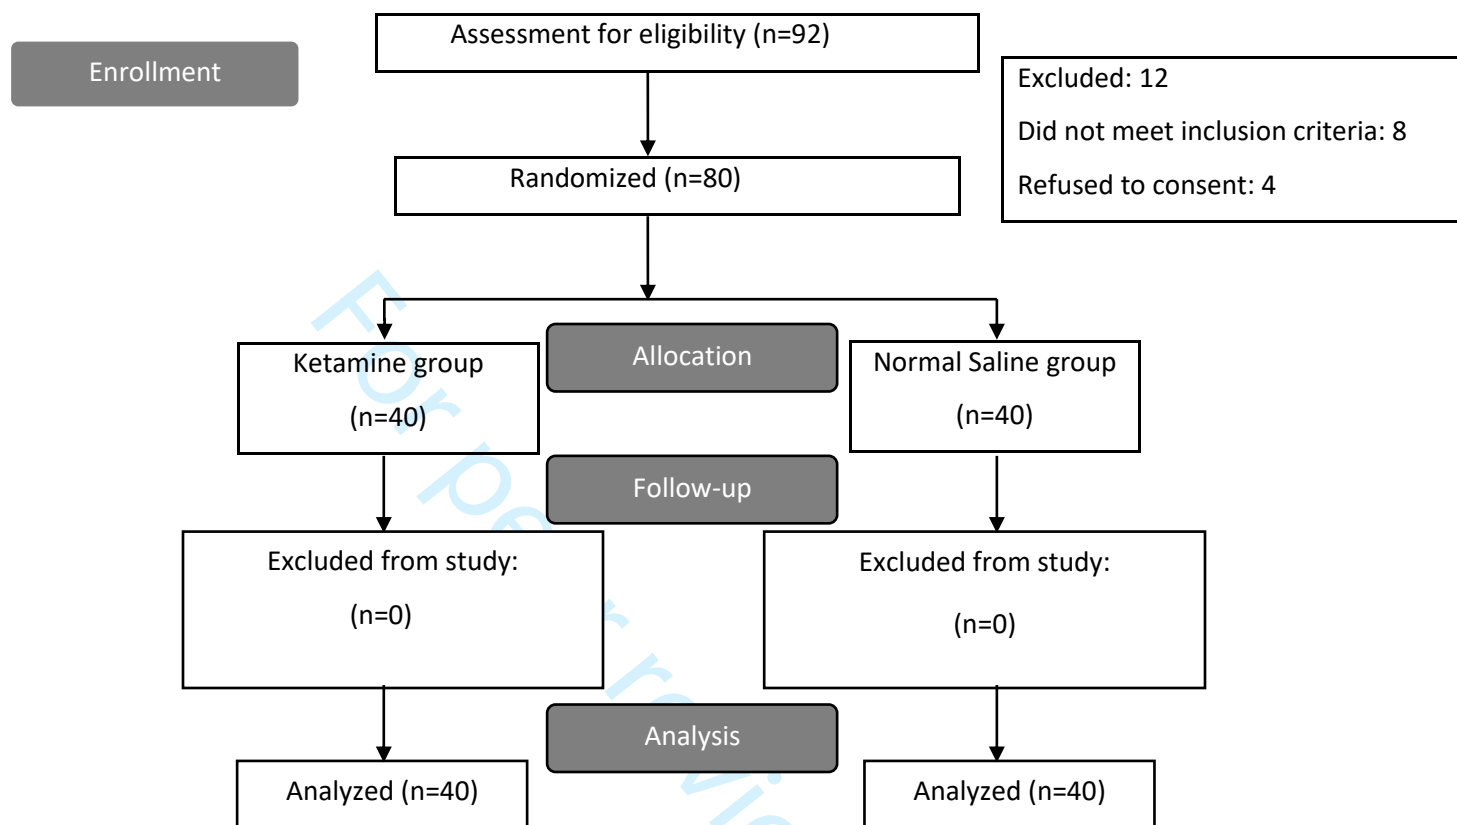

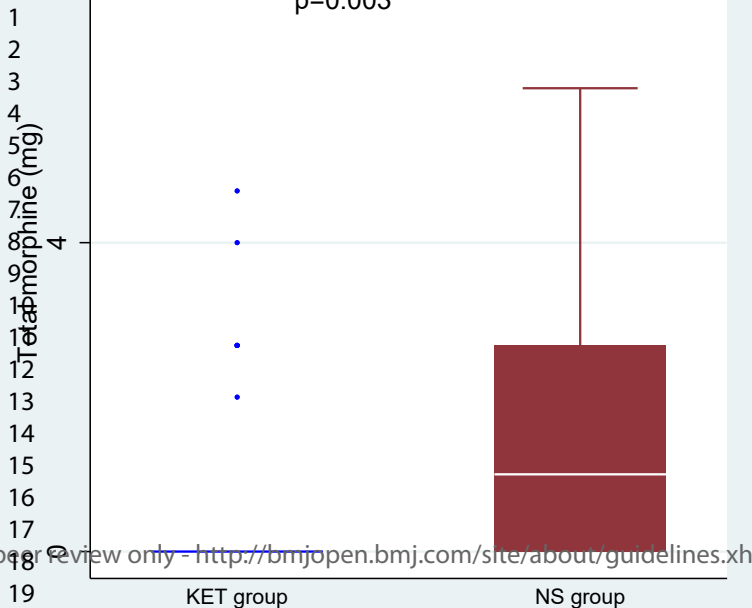

1  
2  
3  
4  
5  
6  
7  
8  
9  
10  
11  
12  
13  
14  
15  
16  
17  
18  
19  
20

■ KET group  
■ NS group  
\* Outliers

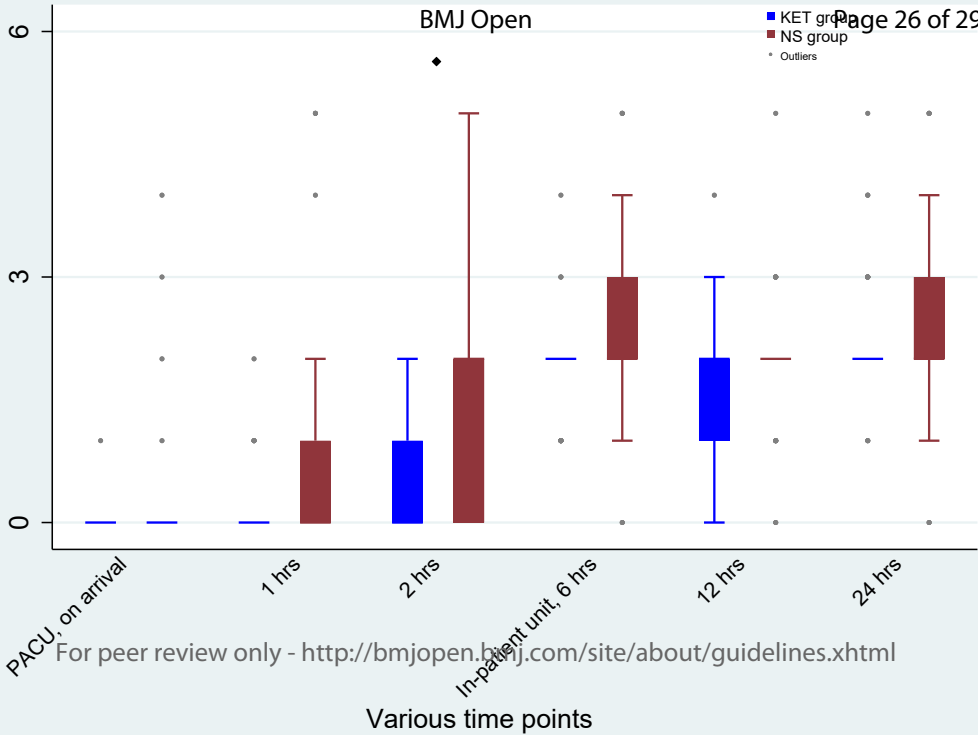

Various time points

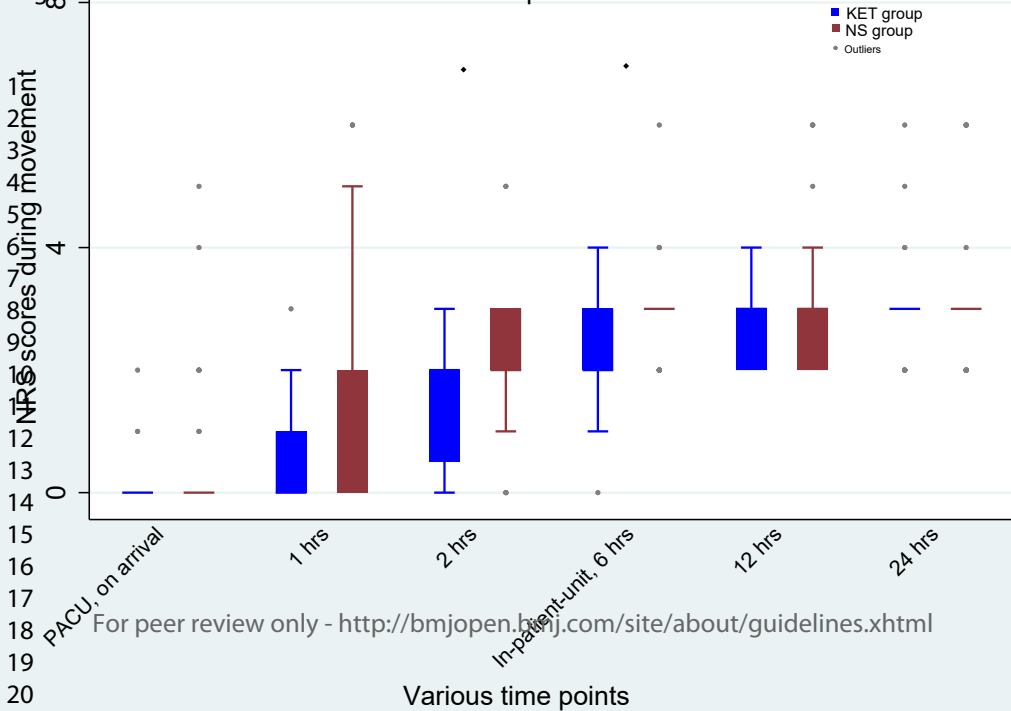

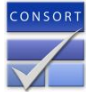

## CONSORT 2010 checklist of information to include when reporting a randomised trial\*

| Section/Topic                    | Item No | Checklist item                                                                                                                                                                              | Reported on page No |
|----------------------------------|---------|---------------------------------------------------------------------------------------------------------------------------------------------------------------------------------------------|---------------------|
| <b>Title and abstract</b>        |         |                                                                                                                                                                                             |                     |
|                                  | 1a      | Identification as a randomised trial in the title                                                                                                                                           | 1                   |
|                                  | 1b      | Structured summary of trial design, methods, results, and conclusions (for specific guidance see CONSORT for abstracts)                                                                     | 2,3                 |
| <b>Introduction</b>              |         |                                                                                                                                                                                             |                     |
| Background and objectives        | 2a      | Scientific background and explanation of rationale                                                                                                                                          | 4                   |
|                                  | 2b      | Specific objectives or hypotheses                                                                                                                                                           | 4                   |
| <b>Methods</b>                   |         |                                                                                                                                                                                             |                     |
| Trial design                     | 3a      | Description of trial design (such as parallel, factorial) including allocation ratio                                                                                                        | 5                   |
|                                  | 3b      | Important changes to methods after trial commencement (such as eligibility criteria), with reasons                                                                                          | N/A                 |
| Participants                     | 4a      | Eligibility criteria for participants                                                                                                                                                       | 5                   |
|                                  | 4b      | Settings and locations where the data were collected                                                                                                                                        | 5                   |
| Interventions                    | 5       | The interventions for each group with sufficient details to allow replication, including how and when they were actually administered                                                       | 6                   |
| Outcomes                         | 6a      | Completely defined pre-specified primary and secondary outcome measures, including how and when they were assessed                                                                          | 7,8                 |
|                                  | 6b      | Any changes to trial outcomes after the trial commenced, with reasons                                                                                                                       | N/A                 |
| Sample size                      | 7a      | How sample size was determined                                                                                                                                                              | 8                   |
|                                  | 7b      | When applicable, explanation of any interim analyses and stopping guidelines                                                                                                                | N/A                 |
| <b>Randomisation:</b>            |         |                                                                                                                                                                                             |                     |
| Sequence generation              | 8a      | Method used to generate the random allocation sequence                                                                                                                                      | 5                   |
|                                  | 8b      | Type of randomisation; details of any restriction (such as blocking and block size)                                                                                                         | 5                   |
| Allocation concealment mechanism | 9       | Mechanism used to implement the random allocation sequence (such as sequentially numbered containers), describing any steps taken to conceal the sequence until interventions were assigned | 5                   |
| Implementation                   | 10      | Who generated the random allocation sequence, who enrolled participants, and who assigned participants to interventions                                                                     | 5                   |
| Blinding                         | 11a     | If done, who was blinded after assignment to interventions (for example, participants, care providers, those                                                                                | 6                   |



|    |                          |                                                             |                                                                                                                  |                                                  |
|----|--------------------------|-------------------------------------------------------------|------------------------------------------------------------------------------------------------------------------|--------------------------------------------------|
| 1  |                          | assessing outcomes) and how                                 |                                                                                                                  |                                                  |
| 2  | 11b                      | If relevant, description of the similarity of interventions | 6                                                                                                                |                                                  |
| 3  | Statistical methods      | 12a                                                         | Statistical methods used to compare groups for primary and secondary outcomes                                    | 8                                                |
| 4  |                          | 12b                                                         | Methods for additional analyses, such as subgroup analyses and adjusted analyses                                 | N/A                                              |
| 5  |                          |                                                             |                                                                                                                  |                                                  |
| 6  | <b>Results</b>           |                                                             |                                                                                                                  |                                                  |
| 7  | Participant flow (a      | 13a                                                         | For each group, the numbers of participants who were randomly assigned, received intended treatment, and         | Figure 1                                         |
| 8  | diagram is strongly      |                                                             | were analysed for the primary outcome                                                                            |                                                  |
| 9  | recommended)             | 13b                                                         | For each group, losses and exclusions after randomisation, together with reasons                                 | Figure 1                                         |
| 10 | Recruitment              | 14a                                                         | Dates defining the periods of recruitment and follow-up                                                          | 5,7                                              |
| 11 |                          | 14b                                                         | Why the trial ended or was stopped                                                                               | N/A                                              |
| 12 | Baseline data            | 15                                                          | A table showing baseline demographic and clinical characteristics for each group                                 | Table 1                                          |
| 13 | Numbers analysed         | 16                                                          | For each group, number of participants (denominator) included in each analysis and whether the analysis was      | Figure 1                                         |
| 14 |                          |                                                             | by original assigned groups                                                                                      |                                                  |
| 15 | Outcomes and             | 17a                                                         | For each primary and secondary outcome, results for each group, and the estimated effect size and its            | Page 9.                                          |
| 16 | estimation               |                                                             | precision (such as 95% confidence interval)                                                                      | Figure 2                                         |
| 17 |                          | 17b                                                         | For binary outcomes, presentation of both absolute and relative effect sizes is recommended                      | Table 3                                          |
| 18 | Ancillary analyses       | 18                                                          | Results of any other analyses performed, including subgroup analyses and adjusted analyses, distinguishing       | N/A                                              |
| 19 |                          |                                                             | pre-specified from exploratory                                                                                   |                                                  |
| 20 | Harms                    | 19                                                          | All important harms or unintended effects in each group (for specific guidance see CONSORT for harms)            | Table 3                                          |
| 21 |                          |                                                             |                                                                                                                  |                                                  |
| 22 | <b>Discussion</b>        |                                                             |                                                                                                                  |                                                  |
| 23 | Limitations              | 20                                                          | Trial limitations, addressing sources of potential bias, imprecision, and, if relevant, multiplicity of analyses | 11,12                                            |
| 24 | Generalisability         | 21                                                          | Generalisability (external validity, applicability) of the trial findings                                        | 10-12                                            |
| 25 | Interpretation           | 22                                                          | Interpretation consistent with results, balancing benefits and harms, and considering other relevant evidence    | 10-13                                            |
| 26 |                          |                                                             |                                                                                                                  |                                                  |
| 27 | <b>Other information</b> |                                                             |                                                                                                                  |                                                  |
| 28 | Registration             | 23                                                          | Registration number and name of trial registry                                                                   | No.<br>NCT0345049<br>9.<br>clinicaltrial.go<br>v |
| 29 |                          |                                                             |                                                                                                                  |                                                  |
| 30 | Protocol                 | 24                                                          | Where the full trial protocol can be accessed, if available                                                      | Enclosed as<br>supplementar<br>y file            |
| 31 |                          |                                                             |                                                                                                                  |                                                  |
| 32 |                          |                                                             |                                                                                                                  |                                                  |
| 33 |                          |                                                             |                                                                                                                  |                                                  |
| 34 |                          |                                                             |                                                                                                                  |                                                  |
| 35 |                          |                                                             |                                                                                                                  |                                                  |
| 36 |                          |                                                             |                                                                                                                  |                                                  |
| 37 |                          |                                                             |                                                                                                                  |                                                  |
| 38 |                          |                                                             |                                                                                                                  |                                                  |
| 39 |                          |                                                             |                                                                                                                  |                                                  |
| 40 |                          |                                                             |                                                                                                                  |                                                  |
| 41 |                          |                                                             |                                                                                                                  |                                                  |
| 42 |                          |                                                             |                                                                                                                  |                                                  |

Funding 25 Sources of funding and other support (such as supply of drugs), role of funders Non-funded

---

\*We strongly recommend reading this statement in conjunction with the CONSORT 2010 Explanation and Elaboration for important clarifications on all the items. If relevant, we also recommend reading CONSORT extensions for cluster randomised trials, non-inferiority and equivalence trials, non-pharmacological treatments, herbal interventions, and pragmatic trials. Additional extensions are forthcoming: for those and for up to date references relevant to this checklist, see [www.consort-statement.org](http://www.consort-statement.org).

For peer review only
